1

2 **PTP-MEG2 regulates quantal size and fusion pore opening through two distinct**  
3 **structural bases and substrates**

4

5 Yun-Fei Xu\*<sup>#1</sup>, Xu Chen<sup>#2</sup>, Zhao Yang<sup>1</sup>, Peng Xiao<sup>1</sup>, Chun-Hua Liu<sup>3</sup>, Kang-Shuai Li<sup>1</sup>, Xiao-Zhen  
6 Yang<sup>4</sup>, Yi-Jing Wang<sup>1</sup>, Qi Liu<sup>2</sup>, Sheng Zhang<sup>7</sup>, Chuan Wang<sup>5</sup>, Yue-Mao Shen<sup>6</sup>, Zhong-Yin Zhang<sup>#7</sup>,  
7 Wei-Dong Zhao<sup>8</sup>, Chang-He Wang<sup>9</sup>, Zhi-Liang Ji<sup>4</sup>, Min Cui<sup>\*2</sup>, Jin-Peng Sun<sup>\*1</sup> and Xiao Yu<sup>\*&2</sup>

8

9 **Affiliations:**

10 <sup>1</sup>Key Laboratory Experimental Teratology of the Ministry of Education and Department of  
11 Biochemistry and Molecular Biology, Shandong University School of Medicine, 44 Wenhua Xi  
12 Road, Jinan, Shandong, 250012, China

13 <sup>2</sup>Key Laboratory Experimental Teratology of the Ministry of Education and Department of  
14 Physiology, Shandong University School of Medicine, 44 Wenhua Xi Road, Jinan, Shandong,  
15 250012, China

16 <sup>3</sup>Department of Physiology, Taishan Medical University, Taian, Shandong 271000, China.

17 <sup>4</sup>State Key Laboratory of Cellular Stress Biology, School of Life Sciences, Xiamen University,  
18 Xiamen 361102, Fujian, China

19 <sup>5</sup>Department of Pharmacology, Hebei Medical University, Shijiazhuang, China

20 <sup>6</sup>Key Laboratory of Chemical Biology (Ministry of Education), School of Pharmaceutical Sciences,  
21 Shandong University, Jinan, Shandong 250012, China

22 <sup>7</sup>Departments of Medicinal Chemistry and Molecular Pharmacology and of Chemistry, Purdue  
23 Center for Cancer Research, and Purdue Center for Drug Discovery, Purdue University, 575 Stadium  
24 Mall Drive, West Lafayette, IN 47907, USA.

25 <sup>8</sup>Department of Developmental Cell Biology, China Medical University, 77 Puhe Road, Shenbei  
26 New District, 110122 Shenyang, China.

27 <sup>9</sup>Center for Mitochondrial Biology and Medicine, The Key Laboratory of Biomedical Information  
28 Engineering of Ministry of Education, School of Life Science and Technology, Xi'an Jiaotong  
29 University, Xi'an, China

30 <sup>#</sup> These authors contributed equally to this work

31 <sup>&</sup>Lead author

32 <sup>\*</sup> Corresponding author: Jin-Peng Sun (corresponding author)

33 E-mail: sunjinpeng@bjmu.edu.cn

34 Xiao Yu (corresponding author)

35 E-mail: yuxiao@sdu.edu.cn

36 Min Cui (corresponding author)

37 E-mail: cuimin@sdu.edu.cn

38 Yun-Fei Xu (corresponding author)

39 E-mail: xuyunfei1988@126.com

40 **SUMMARY**

41

42 **The tyrosine phosphorylation of secretion machinery proteins is a crucial regulatory**  
43 **mechanism for exocytosis. However, the participation of tyrosine phosphatases in**  
44 **different exocytosis stages has not been defined. Here, we demonstrated that PTP-MEG2**  
45 **controls multiple steps of catecholamine secretion. Biochemical and crystallographic**  
46 **analysis revealed key residues that govern the PTP-MEG2 and NSF-pY<sup>83</sup> site interactions,**  
47 **specify PTP-MEG2 substrate selectivity and modulate the fusion of catecholamine-**  
48 **containing vesicles. Unexpectedly, delineation of the PTP-MEG2 mutants along with the**  
49 **NSF interface revealed that PTP-MEG2 controls the fusion pore opening through another**  
50 **unknown substrate. Utilizing a bioinformatics search and biochemical and**  
51 **electrochemical screening, we uncovered that PTP-MEG2 regulates the opening and**  
52 **extension of the fusion pore by dephosphorylating the MUNC18-1 Y<sup>145</sup> site, which is**  
53 **associated with epileptic encephalopathy. The crystal structure of the PTP-**  
54 **MEG2/phospho-MUNC18-1-pY<sup>145</sup> segment confirmed the interaction of PTP-MEG2 with**  
55 **MUNC18-1 through a distinct structural basis. Our studies extended mechanism insights**  
56 **in complex exocytosis processes.**

57

58 **KEY WORDS:**

59

60 **exocytosis, tyrosine phosphorylation, structure, catecholamine, PTP-MEG2**

61

62 **HIGHLIGHTS:**

63

64 **PTP-MEG2 regulates multiple steps of exocytosis.**

65 **A crystal structure of the PTP-MEG2/phosphor-NSF-pY<sup>83</sup> segment was obtained.**

66 **Functional delineation of the PTP-MEG2/NSF interface resulted in uncovering unknown**  
67 **PTP-MEG2 substrates.**

68 **PTP-MEG2 regulates fusion pore opening and extension through the MUNC18-1 pY<sup>145</sup>**  
69 **site.**

70 **The distinct structural bases of the recognition of substrates by PTP-MEG2 allows**  
71 **selective inhibitor design.**

72

73

74

75

76 **INTRODUCTION**

77

78 **Secretion via vesicle exocytosis is a fundamental biological event involved in almost all**

79 physiological processes (Wu et al., 2014, Dittman and Ryan, 2019, Neher and Brose, 2018).  
80 The contents of secreted vesicles include neuronal transmitters, immune factors and other  
81 hormones (Alvarez de Toledo et al., 1993, Sudhof, 2013, Magadmi et al., 2019). There are three  
82 main exocytosis pathways in secretory cells, namely, full-collapse fusion, kiss-and-run, and  
83 compound exocytosis, which possess different secretion rates and release amount (Sudhof, 2004).  
84 It was previously reported that the phosphorylation of critical proteins at serine/threonine or  
85 tyrosine residues participated in stimulus–secretion coupling in certain important exocytosis  
86 processes, for example, the secretion of insulin from pancreatic  $\beta$  cells and of catecholamine  
87 from the adrenal medulla (Ortsater et al., 2014, Seino et al., 2009, Laidlaw et al., 2017).  
88 However, the exact roles of protein tyrosine phosphatases (PTPs) in the regulation of key  
89 hormone secretion procedures are not fully understood.

90 The 68-kDa PTP-MEG2, encoded by *ptpn9*, is a non-receptor classical PTP encompassing a  
91 unique N-terminal domain with homology to the human CRAL/TRIO domain and yeast Sec14p  
92 (Alonso et al., 2004, Gu et al., 1992, Zhang et al., 2012, Zhang et al., 2016, Cho et al., 2006,  
93 Huynh et al., 2004). The N-terminal Sec14p homology domain of PTP-MEG2 recognizes  
94 specific phospholipids in the membrane structure and is responsible for its specific subcellular  
95 location. In secretory immune cells, PTP-MEG2 has been suggested to regulate vesicle fusion  
96 via directly dephosphorylating the pY<sup>83</sup> site of N-ethylmaleimide-sensitive fusion protein (NSF)  
97 (Huynh et al., 2004). However, many key issues regarding PTP-MEG2-regulated cell secretion  
98 remain controversial or even unexplored. For example, it is uncertain whether PTP-MEG2  
99 regulates vesicle exocytosis only inside immune cells (Zhang et al., 2016) and play only  
100 insignificant roles in other hormone secretion processes. It remains elusive whether PTP-MEG2  
101 regulates vesicle trafficking pathways other than NSF-mediated vesicle fusion.

102 Functional characterization of PTP-MEG2 in vivo normally requires a knockout model;  
103 however, PTP-MEG2-deficient mice show neural tube and vascular defects, and the deficiency  
104 is embryonic lethal (Wang et al., 2005). Alternatively, a specific inhibitor of PTP has the  
105 properties of fast action and no compensatory effect, which enable it to serve as a powerful tool  
106 to investigate PTP-MEG2 functions (Zhang et al., 2012, Yu and Zhang, 2018). Recently, we  
107 developed a potent and selective PTP-MEG2 inhibitor, Compound 7, that has a  $K_i$  of 34 nM  
108 and shows at least 10-fold selectivity for PTP-MEG2 over more than 20 other PTPs (Zhang et  
109 al., 2012). The application of this selective PTP-MEG2 inhibitor in combination with  
110 electrochemical approaches enabled us to reveal that PTP-MEG2 regulates multiple steps of  
111 catecholamine secretion from the adrenal medulla by controlling the vesicle size, the release  
112 probabilities of individual vesicles and the initial opening of the fusion pore during exocytosis.  
113 Further crystallographic study of the PTP-MEG2 protein in complex with the pY<sup>83</sup>-NSF  
114 fragment and enzymological kinetic studies captured the transient interaction between PTP-  
115 MEG2 and NSF and provided the structural basis for PTP-MEG2 substrate specificity.

116 Interestingly, by delineating the substrate specificity of deficient PTP-MEG2 mutants in the  
117 study of catecholamine secretion from primary chromaffin cells, our results suggested that PTP-  
118 MEG2 regulated the initial opening of the fusion pore during exocytosis by regulating  
119 substrates other than the known NSF through distinct structural bases. We therefore took  
120 advantage of this key knowledge and utilized bioinformatics analysis, GST pull-down  
121 screening, enzymology and electrochemical to identify the potential key PTP-MEG2 substrates  
122 involved in fusion pore opening. These experiments led to the identification of several new  
123 PTP-MEG2 substrates in the adrenal medulla, of which MUNC18-1-Y<sup>145</sup> is the crucial  
124 dephosphorylation site of PTP-MEG2 in the regulation of initial pore opening and expansion.  
125 Further crystallographic analysis and functional assays with MUNC18-1 Y<sup>145</sup> revealed the  
126 structural basis of the recognition of MUNC18-1 by PTP-MEG2 and how Y<sup>145</sup> phosphorylation  
127 regulates fusion pore opening. Our results provide new information and mechanistic insights  
128 regarding how dynamic tyrosine phosphorylation and PTP-MEG2 explicitly regulate different  
129 processes of vesicle fusion and hormone secretion, both of which may lead to human disease  
130 when dysregulated.

131

## 132 **RESULTS**

133

### 134 **Phosphatase activity of PTP-MEG2 is required for catecholamine secretion from adrenal** 135 **glands**

136

137 Endogenous PTP-MEG2 expression was readily detected in mouse adrenal gland and  
138 chromaffin cell line PC12 cells (Supplemental Fig. 1-1A-B). PTP-MEG2 knockout is  
139 embryonic lethal (Wang et al., 2005). To investigate the functional role of PTP-MEG2 in  
140 catecholamine secretion from adrenal glands, we therefore applied our newly developed  
141 specific PTP-MEG2 inhibitor (Compound 7) (Supplemental Fig. 1-1C). The inhibitor  
142 Compound 7 is a potent PTP-MEG2 inhibitor, with a potency of 34 nM and extraordinary  
143 selectivity against other phosphatases (Zhang et al., 2012). The administration of either high  
144 concentrations of potassium chloride (70 mM) or 100 nM Angiotensin II (AngII) significantly  
145 increased the secretion of both epinephrine (EPI) and norepinephrine (NE) from adrenal  
146 medulla, as previously reported (Liu et al., 2017, Teschemacher and Seward, 2000), and this  
147 effect was specifically blocked by pre-incubation with Compound 7 (2  $\mu$ M) for 1 hour (Fig.  
148 1A-D). Notably, basal catecholamine secretion was also decreased after pre-incubation with  
149 Compound 7 (Fig. 1A-D). However, the catecholamine contents were not changed in response  
150 to Compound 7 incubation (Supplemental Fig. 1-1D-E). These results indicated that PTP-  
151 MEG2 plays an essential role in catecholamine secretion from the adrenal medulla.

152

153 **PTP-MEG2 inhibition reduced the quantal size and the release probabilities of**  
154 **catecholamine secretion from individual vesicles.**

155

156 We used the carbon fiber electrode (CFE) to characterize the effects of PTP-MEG2  
157 inhibition on the kinetics of catecholamine secretion from primary cultured chromaffin cells  
158 (Chen et al., 2005, Harada et al., 2015) (Fig. 1E-F and Supplemental Fig. 1-1F-G). The  
159 Angiotensin II-induced catecholamine secretion was gradually attenuated by increasing the  
160 concentration of Compound 7 after pre-incubation with the primary chromaffin cells, from 20%  
161 at 100 nM Compound 7 to 80% at 2  $\mu$ M inhibitor (Fig. 1E-F and Supplemental Fig. 1-1 F-H).  
162 We then compared isolated amperometric spikes of chromaffin cells pre-incubated with  
163 different concentrations of Compound 7 to determine the effect of the inhibition of PTP-MEG2  
164 activity on quantal size (total amperometric spike charge) and vesicle release probability. The  
165 application of PTP-MEG2 inhibitor reduced quantal size, as indicated by statistical analysis of  
166 the quantal size distribution and averaged amperometric spike amplitude (Fig. 1G and  
167 Supplemental Fig. 1-1 I). Specifically, the peak of the amperometric spikes was reduced from  
168 1.1 pC to 0.5 pC after incubation with 400 nM Compound 7 (Fig. 1G). The number of AngII-  
169 induced amperometric spikes was also significantly decreased in the presence of Compound 7,  
170 suggesting that either the release probabilities of individual vesicles or the size of the readily  
171 released pool was affected (Supplemental Fig. 1-1 J).

172

173 We next used transmission electron microscopy to examine the location of the large-dense-  
174 core vesicles (LDCVs) in the adrenal gland medulla after incubation with AngII and Compound  
175 7 (Fig. 1H-M and Supplemental Fig. 1-2 A-B). There was no significant difference in the  
176 location of the LDCVs when these vesicles were sub-grouped by 200 nanometre bins according  
177 to their distance from the chromaffin plasma membrane (Fig. 1J). However, the application of  
178 400 nM Compound 7 significantly decreased the number of docking vesicles in contact with  
179 the plasma membrane (Fig. 1K-L). These results indicated that the inhibition of PTP-MEG2  
180 activity by Compound 7 decreased the release probabilities of individual vesicles but did not  
181 affect the size of the readily released pool. Moreover, the observed numbers of LDCVs with  
182 diameters larger than 150 nm observed by electron microscopy were significantly decreased by  
183 more than 70% after incubation with Compound 7 (Fig. 1M), which is consistent with the  
184 statistical analysis of the total amperometric spike charge obtained by electrochemical  
185 measurement (Supplemental Fig. 1-1H-M).

186

187 **PTP-MEG2 regulates the initial opening of the fusion core**

188

189 Generally, the presence of pre-spike foot (PSF) is a common phenomenon preceding large  
190 amperometric spikes of catecholamine secretion in chromaffin cells, while stand-alone foot  
191 (SAF) is considered to represent “kiss-and-run” exocytosis (Chen et al., 2005). Both PSF and  
192 SAF are generally considered indications of the initial opening of the fusion pore (Alvarez de  
193 Toledo et al., 1993, Zhou et al., 1996). In this study, the PSF frequency significantly decreased  
194 from 25% to 3% after pre-incubation with Compound 7 in response to AngII stimulation (Fig.  
195 1N). The inhibitor Compound 7 had no significant effect on the PSF duration (Supplemental  
196 Fig. 1-2 C-D) but markedly reduced the amplitude and charge of PSF (Supplemental Fig. 1-2  
197 E-F). Similar results were observed for the SAF (Supplemental Fig. 1-2 G-J). The PTP-MEG2  
198 inhibitor Compound 7 reduced the SAF percentage from 18% to 4% (Fig. 1N). Intriguingly, the  
199 duration of SAF was also decreased with increasing Compound 7 concentration, in contrast to  
200 the PSF (Supplemental Fig. 1-2H). Additionally, the average amplitude and charge of SAF  
201 decreased from 14 pA to 5 pA and from 150 fC to 65 fC, respectively (Supplemental Fig. 1-2  
202 I-J). These results suggested that PTP-MEG2 activity was required for the initial opening of the  
203 fusion core but had no effect on the endocytosis rate of the partially fused vesicles.

204

#### 205 **The crystal structure of the PTP-MEG2/phospho-NSF complex revealed significant** 206 **structural rearrangement in the WPD loop and $\beta$ 3-loop- $\beta$ 4**

207

208 PTP-MEG2 is known to modulate interleukin-2 secretion in macrophages via de-  
209 phosphorylating NSF, a key regulator in vesicle fusion (Huyhn et al., 2004). In response to  
210 stimulation with either high potassium chloride or AngII, the two stimulators for catecholamine  
211 secretion from the adrenal medulla, the tyrosine phosphorylation of NSF increased, indicating  
212 that NSF phosphorylation actively participates in catecholamine secretion (Fig. 2A and  
213 Supplemental Fig. 2A-B). Moreover, a significant portion of NSF co-localized with PTP-  
214 MEG2 in adrenal medulla with AngII stimulation, and the trapping mutant PTP-MEG2-  
215 C<sup>515</sup>SD<sup>470</sup>A interacted with the tyrosine-phosphorylated NSF from the adrenal medulla treated  
216 with peroxide (Fig. 2B-D and Supplemental Fig. 2C-D), indicating that PTP-MEG2 regulates  
217 catecholamine secretion in chromaffin cells through directly dephosphorylation of NSF.

218

219 We therefore co-crystallized PTP-MEG2/phospho-NSF-E<sup>79</sup>-pY<sup>83</sup>-K<sup>87</sup>, and the structure  
220 was solved at 1.7 Å (Table 1). The 2Fo-Fc electron density map allowed unambiguous  
221 assignment of the phospho-NSF-E<sup>79</sup>-pY<sup>83</sup>-K<sup>87</sup> in the crystal structure (Fig. 2E-F). Importantly,  
222 the binding of phospho-NSF-E<sup>79</sup>-pY<sup>83</sup>-K<sup>87</sup> induced substantial conformational changes at both  
223 the WPD loop and  $\beta$ 3-loop- $\beta$ 4 compared to the crystal structure of PTP-MEG2 alone (Barr et  
224 al., 2009) (Fig. 2G-H). Specifically, the interaction of the phosphate of the pY<sup>83</sup> of the NSF



225 with the guanine group of the R<sup>521</sup> of the PTP-MEG2 induced a rotation of approximately 90  
226 degrees, which resulted in the movement of the W<sup>468</sup> and a traverse of 7 Å of the WPD loop for  
227 a closed state (Fig. 2I-J). Unique to the PTP-MEG2/substrate complex, the movement of L<sup>466</sup>  
228 in the WPD loop by 1.7 Å enabled the formation of a new hydrogen bond between its main  
229 chain carbonyl group and the side chain of R<sup>403</sup> (Fig. 2I-J). The disruption of the salt bridge  
230 between E<sup>406</sup> and R<sup>521</sup> also contributed to the new conformational state of the N-terminal of β3-  
231 loop-β4 (Fig. 2K-L). The presence of phosphate in the PTP-MEG2 active site C-terminal to β3-  
232 loop-β4 caused a 180 degree rotation of the side chain of S<sup>516</sup>, allowing its side chain oxygen  
233 to form a new hydrogen bond with the main chain carbonyl of the K<sup>411</sup> (Fig. 2K-L). This  
234 structural rearrangement altered the side chain conformation of K<sup>411</sup>, which pointed to the  
235 solvent region and formed new polar interactions with E<sup>406</sup> and the carbonyl group of R<sup>409</sup> (Fig.  
236 2K-L). Moreover, the presence of the phospho-NSF-E<sup>79</sup>-pY<sup>83</sup>-K<sup>87</sup> peptide between R<sup>409</sup> and D<sup>335</sup>  
237 disrupted their charge interaction, which enabled a movement of the main chain from G<sup>408</sup> to  
238 K<sup>411</sup>, accompanied by a side chain movement of R<sup>410</sup> and the formation of new polar interactions  
239 with the main chain of P<sup>378</sup> and C<sup>412</sup> (Fig. 2M-N). The structural rearrangements that occurred  
240 at WPD and β3-loop-β4 enabled the accommodation of the phospho-substrate of PTP-MEG2  
241 and may be important for its appropriate interaction with its physiological substrates/partners  
242 and subsequent activation.

243

#### 244 **Structural basis of the PTP-MEG2-NSF interaction**

245

246 The structural analysis identified critical residues for phospho-substrate recognition by  
247 PTP-MEG2 (Fig. 3A). Y<sup>333</sup> forms extensive hydrophobic interaction with the phenyl ring of the  
248 pY<sup>83</sup> of NSF. Mutation of this residue caused a significant decrease of more than 3-fold in  
249 activity for both pNPP and phospho-NSF-peptide, suggesting that this residue is important for  
250 PTP-MEG2 recognition of all substrates with phenyl rings. N-terminal to pY<sup>83</sup>, the side chain  
251 oxygen of S<sup>81</sup> forms a hydrogen bond with the carbonyl oxygen of the main chain of R<sup>332</sup> of  
252 PTP-MEG2. The carbonyl oxygen of the main chain of S<sup>81</sup> forms a hydrogen bond with the  
253 amide of G<sup>334</sup>, and L<sup>82</sup> forms hydrophobic interactions with the side chain of D<sup>335</sup> (Fig. 3A).  
254 Specifically, mutation of G<sup>334</sup> to R impaired the activity of PTP-MEG2 towards the NSF-pY<sup>83</sup>  
255 phospho-peptide but had no effect on its intrinsic pNPP activity, suggesting that G<sup>334</sup> plays an  
256 important role in the recognition of the N-terminal conformation of the peptide substrate (Fig.  
257 3B-C and Supplemental Fig. 3A-B).

258

259 The D<sup>335</sup> in the pY binding loop of PTP-MEG2 is also critical for determining the peptide  
260 orientation of the substrate by forming important hydrogen bonds with the main chain amide

261 and carbonyl groups of pY<sup>83</sup> and T<sup>84</sup>. C-terminal to NSF-pY<sup>83</sup>, Q<sup>559</sup> forms a van der Waals  
262 interaction with T<sup>84</sup>, and F<sup>85</sup> forms substantial hydrophobic interactions with V<sup>336</sup>, F<sup>556</sup> and I<sup>519</sup>  
263 (Fig. 3A). Accordingly, mutation of D<sup>335</sup>A or Q<sup>559</sup>A showed no significant effect on pNPP  
264 activity but substantially decreased their activities towards the phospho-NSF peptide (Fig. 3B-  
265 C and Supplemental Fig. 3A-B). Mutation of I<sup>519</sup>A caused a decrease in the intrinsic activity of  
266 PTP-MEG2 and a further decrease of approximately 4-fold in its ability to dephosphorylate  
267 phospho-NSF-peptide. Moreover, Y<sup>471</sup> forms extensive hydrophobic interactions with T<sup>84</sup> and  
268 Y<sup>85</sup> and a hydrogen bond with the carboxyl group of pY<sup>83</sup>. Mutation of Y<sup>471</sup> to either A or F  
269 greatly reduced its activity towards phospho-NSF- E<sup>79</sup>-pY<sup>83</sup>-K<sup>87</sup> peptide but had little effect on  
270 pNPP dephosphorylation. Taken together, the structural analysis and enzymology studies  
271 identified G<sup>334</sup>, D<sup>335</sup>, Y<sup>471</sup>, I<sup>519</sup> and Q<sup>559</sup> as critical residues for the substrate recognition of NSF  
272 by PTP-MEG2. Importantly, although none of these residues are unique to PTP-MEG2, the  
273 combination of these residues is not identical across the PTP superfamily but is conserved  
274 between PTP-MEG2 across different species, highlighting the important roles of these residues  
275 in mediating specific PTP-MEG2 functions (Fig. 3D and Supplemental Fig. 4).

276

## 277 **Molecular determinants of Q559:D335 for the substrate specificity of PTP-MEG2**

278

279 The pY+1 pocket is an important determinant of substrate specificity in different PTP  
280 superfamily members (Barr et al., 2009, Li et al., 2016, Yu et al., 2011, Wang et al., 2014). The  
281 pY+1 pocket of PTP-MEG2 was found to consist of D<sup>335</sup>, V<sup>336</sup>, F<sup>556</sup> and Q<sup>559</sup> (Fig. 4A). Unique  
282 to the PTP-MEG2/NSF-E<sup>79</sup>-pY<sup>83</sup>-K<sup>87</sup> complex structure, a relatively small T<sup>84</sup> residue occurs  
283 at the pY+1 position, in contrast to pY<sup>1163</sup> in the PTP1B/EGFR-pY<sup>992</sup> complex structure, D<sup>395</sup>  
284 in the LYP/SKAP-HOM-pY<sup>75</sup> complex structure and L<sup>1249</sup> in the PTPN18/phospho-HER2-  
285 pY<sup>1248</sup> complex structure (Fig. 4A). Although several PTPs have an equivalent D:Q pair similar  
286 to D<sup>335</sup>:Q<sup>559</sup> of PTP-MEG2 determining the entrance of the pY+1 residue into the pY+1 pocket,  
287 such as PTP1B, LYP, PTPN18, STEP, PTP-Meg1, SHP1, PTPH1 and SHP2, structural analysis  
288 indicated that the C $\beta$  between Q<sup>559</sup> and D<sup>335</sup> is the smallest in PTP-MEG2, at least 1 Å narrower  
289 than in the other PTP structures examined (Fig. 4B). The narrower pY+1 pocket entrance could  
290 be a unique feature of the substrate recognition of PTP-MEG2.

291

292

## 293 **PTP-MEG2 regulates two different processes of catecholamine secretion through a** 294 **distinct structural basis**

295

296 We next infected primary chromaffin cells with lentivirus encoding wild-type PTP-MEG2



297 or different mutants for electrochemical investigation of the structure-function relationship of  
298 PTP-MEG2 in the regulation of catecholamine secretion (Fig. 5A and Supplemental Fig. 5A-  
299 F). In addition to wild-type PTP-MEG2, we chose 5 PTP-MEG2 mutants, including G<sup>334</sup>R,  
300 D<sup>335</sup>A, Y<sup>471</sup>A, Y<sup>471</sup>F, I<sup>519</sup>A and Q<sup>559</sup>A, whose positions are determinants of the interactions  
301 between PTP-MEG2 and NSF from the pY<sup>83</sup>-1 position to the pY<sup>83</sup>+2 position (Fig. 5B). The  
302 overexpression of wild-type PTP-MEG2 significantly increased both the number and amplitude  
303 of the amperometric spikes, which are indicators of the release probabilities of individual  
304 vesicles and quantal size, respectively (Fig. 5C-F). In contrast, expression of G<sup>334</sup>R, D<sup>335</sup>A,  
305 Y<sup>471</sup>A, Y<sup>471</sup>F, I<sup>519</sup>A and Q<sup>559</sup>A all significantly decreased the quantal size, the release  
306 probabilities of individual vesicles, the half width and the rise rate of each spike (Fig. 5C-F and  
307 Supplemental Fig. 5G-I). These results suggested that the interaction of PTP-MEG2 with NSF  
308 substrate is important for controlling vesicle size and the release probability of catecholamine  
309 secretion.

310

311 Unexpectedly, the PTP-MEG2 mutants showed different effects on the probability of the  
312 occurrence of the foot, which is an indicator of the initial opening of the fusion core (Fig. 5G).  
313 G<sup>334</sup>R mutation which disrupted the recognition of the N-terminal conformation of the peptide  
314 substrate of PTP-MEG2, and D<sup>335</sup>A and Q<sup>559</sup>A, which are the determinants of pY+1 substrate  
315 specificity, significantly reduced the high potassium chloride-induced foot probability. The  
316 mutations of I<sup>519</sup> and Y<sup>471</sup>, which form specific interactions with the F<sup>85</sup> of the NSF and are  
317 determinants of the C-terminal region of the central phospho-tyrosine involved in the substrate  
318 specificity of PTP-MEG2, showed no significant effect (Fig. 5B and Fig. 5G). These results  
319 indicated that PTP-MEG2 regulated the initial opening of the fusion core via a distinct structural  
320 basis from that of vesicle fusion, probably through dephosphorylating other unknown substrates.  
321 As D<sup>335</sup>A and Q<sup>559</sup>A of PTP-MEG2 maintained the occurrence of the foot probability, the  
322 unknown PTP-MEG2 substrate that regulates the fusion pore opening should have a small  
323 residue, such as G, A, S or T at the pY+1 position. Conversely, the unknown PTP-MEG2  
324 substrate should have a less hydrophobic residue at the pY+2 position because Y<sup>471</sup>F, Y<sup>471</sup>A and  
325 I<sup>519</sup>A of PTP-MEG2 had no significant effect on the foot probability.

326

### 327 **Identification of new PTP-MEG2 substrates that contributed to the initial opening of the** 328 **fusion core**

329

330 The effects of PTP-MEG2 mutations along the PTP-MEG2/NSF-phospho-segment  
331 interface on catecholamine secretion indicated that not NSF but another PTP-MEG2 substrate  
332 with distinct sequence characteristics contributes to the regulation of “foot probability” (Fig.  
333 5). We therefore utilize this key information to search for new potential PTP-MEG2 substrates

334 by bioinformatics methods (Fig. 6A). First, we searched for the keywords “fusion pore”,  
335 “secretory vesicle” and “tyrosine phosphorylation” using the functional protein association  
336 network STRING and the text mining tool PubTator, which resulted in a candidate list of 55  
337 proteins. Second, we applied UniProt by selecting proteins located only in the membrane or  
338 vesicle, which limited the candidates to 28 members. Third, as our experiments were carried  
339 out in the adrenal gland, we used the Human Protein Atlas database for filtering, which  
340 narrowed the candidate list to 18 proteins. Finally, we exploited the post-translational-motif  
341 database PhosphoSitePlus to screen candidate proteins with potential phospho-sites that  
342 matched the sequence requirements at both the pY+1 position and the pY+2 position, which  
343 are “G, S, A, T, V, P” and “G, A, S, T, C, V, L, P, D, H”, respectively. These positions were  
344 further evaluated by surface exposure if a structure was available. The combination of these  
345 searches produced 11 candidate lists with predicted pY positions (Fig. 6B).

346

347 To biochemically characterize whether these proteins are substrates of PTP-MEG2, we  
348 transfected the plasmids encoding the cDNAs of these candidate proteins into PC12 cells,  
349 stimulated the cells with AngII, and performed a pull-down assay with the GST-MEG2-D<sup>470</sup>A  
350 trapping mutant or GST controls. The known PTP-MEG2 substrate NSF was used as a positive  
351 control. Notably, five candidates, including PACSIN1, MUNC18-1, VAMP7, DYNAMIN1 and  
352 SNAP25, showed specific interactions with PTP-MEG2 after AngII stimulation in PC12 cells  
353 (Fig. 6C and Supplemental Fig. 6A). Whereas the protein and mRNA of MUNC18-1, VAMP7,  
354 DYNAMIN1 and SNAP25 were readily detected in the adrenal medulla, PACSIN1 showed  
355 relatively lower expression than in the liver and brain (Supplemental Fig. 6B). Moreover,  
356 whereas MUNC18-1, VAMP7 and DYNAMIN1 strongly co-localized with PTP-MEG2 in the  
357 adrenal medulla (Fig. 6D-E and Supplemental Fig. 6C), the co-localization of SNAP25 and  
358 PACSIN1 with PTP-MEG2 was relatively weak (Supplemental Fig. 6D-E). MUNC18-1 and  
359 VAMP7 are candidate PTP-MEG2 substrates that were further strengthened by the fact that the  
360 high potassium chloride- or AngII-stimulated tyrosine phosphorylation of these proteins in the  
361 adrenal medulla was significantly dephosphorylated by PTP-MEG2 in vitro (Supplemental Fig.  
362 7-1 A-I).

363

364 **PTP-MEG2 regulated the initial opening of the fusion core through dephosphorylating**  
365 **MUNC18-1 at the pY<sup>145</sup> site**

366

367 The predicted PTP-MEG2 dephosphorylation site on MUNC18-1 (also called STXBP1)  
368 is Y<sup>145</sup>, which is localized on the  $\beta$  sheet linker and forms extensive hydrophobic interactions  
369 with surrounding residues to tether the interface between domain 1 and domain 2 (Hu et al.,  
370 2011, Yang et al., 2015) (Fig. 7A and Supplemental Fig. 7-2A). Moreover, the phenolic-oxygen

371 of Y<sup>145</sup> forms specific hydrogen bonds with the main chain amide of F<sup>540</sup> and the main chain  
372 carbonyl oxygens of I<sup>539</sup> and G<sup>568</sup> (Fig. 7B). These key interactions might be involved in  
373 regulating the arrangement of the arc shape of the three domains of MUNC18-1. The  
374 phosphorylation of Y<sup>145</sup> likely abolishes this H-bond network and changes its ability to associate  
375 with different snare complexes participating in vesicle fusion procedures (Fig. 7B).  
376 Interestingly, a missense mutation of MUNC18-1 Y<sup>145</sup>H was found to be associated with early  
377 infantile epileptic encephalopathy (Stamberger et al., 2017) (Fig. 7C).

378

379 Notably, the Y<sup>145</sup>H missense mutation may not be phosphorylated properly. We therefore  
380 overexpressed wild-type MUNC18-1, Y<sup>145</sup>A, a non-phosphorylatable mutant, and the disease-  
381 related Y<sup>145</sup>H mutant in PC12 cells stimulated with AngII and then examined their abilities to  
382 interact with PTP-MEG2. The GST pull-down results indicated that both MUNC18-1 Y<sup>145</sup>A  
383 and Y<sup>145</sup>H, as well as another predicted substrate, VAMP7 Y<sup>45</sup>A/Y<sup>45</sup>C, had significantly  
384 decreased ability to associate with PTP-MEG2 (Fig. 7D). In contrast, mutations of the predicted  
385 phosphorylation sites of SNAP25 or DYNAMIN1, including SNAP25-Y<sup>101</sup>A, DYNAMIN1-  
386 Y<sup>354</sup>A and DYNAMIN1- Y<sup>597</sup>A, had no significant effect on their interactions with PTP-MEG2  
387 (Supplemental Fig. 7-1 J). These results confirmed that pY<sup>145</sup> is the major site of MUNC18-1  
388 and VAMP7 pY<sup>45</sup> for recognition by PTP-MEG2 (Fig. 7D).

389

390 We next infected primary chromaffin cells with a lentivirus encoding wild-type MUNC18-1,  
391 the MUNC18-1 Y<sup>145</sup>-tyrosine phosphorylation-deficient mutant Y<sup>145</sup>F, the MUNC18-1 Y<sup>145</sup>-  
392 tyrosine phosphorylation mimic mutant Y<sup>145</sup>E and the disease-related mutant Y<sup>145</sup>H.  
393 Interestingly, either Y<sup>145</sup>E or Y<sup>145</sup>H significantly reduced the PSF and the SAF percentage of  
394 catecholamine secretion in response to AngII stimulation, whereas the phosphorylation-  
395 deficient mutant Y<sup>145</sup>F slightly increased the SAF percentage (Fig. 7E-F, and Supplemental Fig.  
396 7-2 and 7-3). These results suggested that the tyrosine phosphorylation of Y<sup>145</sup> impaired the  
397 initial opening of the fusion core in agonist-induced catecholamine secretion in primary  
398 chromaffin cells.

399

400 To further dissect the mechanism underlying the phosphorylation of MUNC18-1 Y<sup>145</sup> as  
401 well as the disease-related mutant Y<sup>145</sup>H in the regulation of hormone secretion, we compared  
402 the interactions of wild-type and mutant MUNC18-1 with the binding partner SYNTAXIN1  
403 (Lim et al., 2013). Importantly, both the phosphorylation mimic mutant MUNC18-1-Y<sup>145</sup>E and  
404 the disease-related mutant Y<sup>145</sup>H significantly impaired the interaction between MUNC18-1  
405 and SYNTAXIN1 (Fig. 7G). These results suggested that the phosphorylation of Y<sup>145</sup> of  
406 MUNC18-1 decreases the binding of MUNC18-1 to SYNTAXIN1, which plays an important  
407 role in the formation of the foot during catecholamine secretion. In contrast, the

408 dephosphorylation of pY<sup>145</sup> of MUNC18-1 by PTP-MEG2 promoted initial pore opening and  
409 fusion.

410

### 411 **Structural basis of the PTP-MEG2-MUNC18-1 interaction**

412 The  $k_{cat}/K_m$  of PTP-MEG2 towards a phospho-segment derived from MUNC18-1-pY<sup>145</sup> is  
413 very similar to that obtained with a phospho-segment derived from the known substrate pY<sup>83</sup>  
414 site of NSF (Supplemental Fig. 3A-B and 8A). We therefore crystallized the PTP-MEG2  
415 trapping mutant with the MUNC18-1-E<sup>141</sup>-pY<sup>145</sup>-S<sup>149</sup> phospho-segment and determined the  
416 complex structure at 2.2 Å resolution (Table 1). The 2Fo-Fc electro-density map allowed the  
417 unambiguous assignment of seven residues of the phospho-MUNC18-1-E<sup>141</sup>-pY<sup>145</sup>-S<sup>149</sup>  
418 segment in the crystal structure (Fig. 8A). Importantly, comparing with the phospho-NSF-E<sup>79</sup>-  
419 pY<sup>83</sup>-K<sup>87</sup> segment, the phospho-MUNC18-1-E<sup>141</sup>-pY<sup>145</sup>-S<sup>149</sup> displayed different interaction  
420 patterns with the residues in the PTP-MEG2 active site, forming new interactions with Q<sup>393</sup>  
421 and R<sup>410</sup> but looser interactions with Y<sup>471</sup> and I<sup>519</sup> (Fig. 8B). Whereas PTP-MEG2 Y<sup>471</sup> formed  
422 extensive hydrophobic interactions with NSF-T<sup>84</sup> and NSF-F<sup>85</sup>, as well as a well-defined  
423 hydrogen bond (2.4 Å) with the carbonyl oxygen of NSF-pY<sup>83</sup>, PTP-MEG2 Y<sup>471</sup> formed only  
424 a weaker H-bond with the carbonyl oxygen of MUNC18-1-pY<sup>145</sup> due to a 0.62 Å shift of Y<sup>471</sup>  
425 away from the central pY substrate (Fig. 8C and Supplemental Fig. 8B). Similarly, PTP-MEG2  
426 I<sup>519</sup> did not form specific interactions with the MUNC18-1-E<sup>141</sup>-pY<sup>145</sup>-S<sup>149</sup> segment except for  
427 the central pY. In contrast, PTP-MEG2 I<sup>519</sup> formed specific hydrophobic interactions with NSF-  
428 T<sup>84</sup> (Fig. 8D and Supplemental Fig. 8C). Consistently, mutations of PTP-MEG2 Y<sup>471</sup>A, Y<sup>471</sup>F  
429 or I<sup>519</sup>A significantly decreased the phosphatase activity towards the phospho-NSF-E<sup>79</sup>-pY<sup>83</sup>-  
430 K<sup>87</sup> segment (Fig. 3C) but had no significant effect on the phospho-MUNC18-1-E<sup>141</sup>-pY<sup>145</sup>-  
431 S<sup>149</sup> segment (Fig. 8E). Combined with the results that PTP-MEG2 Y<sup>471</sup>A, Y<sup>471</sup>F and I<sup>519</sup>A affect  
432 only the spike number and amount but show not the foot probability (Fig. 5B-G), these data  
433 suggested that PTP-MEG2 regulated intracellular vesicle fusion by modulating the NSF-pY<sup>83</sup>  
434 phospho-state but regulated the process of vesicle fusion pore initiation by dephosphorylating  
435 MUNC18-1 at the pY<sup>145</sup> site (Fig. 8F).

436

### 437 **DISCUSSION**

438

439 Posttranslational modifications of secretion machinery proteins are known as powerful  
440 ways to regulate exocytosis. In contrast to the well-characterized serine/threonine  
441 phosphorylation, the importance of tyrosine phosphorylation in exocytosis has only recently  
442 begun to be appreciated (Seino et al., 2009, Laidlaw et al., 2017, Jewell et al., 2011, Meijer et  
443 al., 2018, Gabel et al., 2019, Cijssouw et al., 2014). In addition to the phosphorylation of NSF

444 at its pY<sup>83</sup> site, recent studies have shown that the tyrosine phosphorylation of MUNC18c at  
445 the pY<sup>219</sup> and pY<sup>527</sup> sites, Annexin-A2 at pY<sup>23</sup>, and MUNC18-1 at pY<sup>473</sup> actively participates in  
446 the vesicle release machinery to explicitly regulate exocytosis processes (Meijer et al., 2018,  
447 Jewell et al., 2011, Gabel et al., 2019). The tyrosine phosphorylation at specific sites of the  
448 signalling molecule is precisely regulated by tyrosine kinases and tyrosine phosphatases (Yu  
449 and Zhang, 2018, Tonks, 2006). Although tyrosine kinases such as the insulin receptor, Src and  
450 Fyn are acknowledged to play critical roles in hormone secretion (Soares et al., 2013, Jewell et  
451 al., 2011, Meijer et al., 2018, Oakie and Wang, 2018), only a very few tyrosine phosphatases  
452 that regulate the vesicle release machinery have been identified, and the structural basis of how  
453 these PTPs selectively dephosphorylate the key tyrosine phosphorylation sites governing  
454 exocytosis was unknown. In the current study, we demonstrated that PTP-MEG2 is an  
455 important regulator of hormone secretion from the medulla, using a selective PTP-MEG2  
456 inhibitor in combination with cellular and electrochemical amperometric recording. The current  
457 study extended the regulatory role of PTP-MEG2 in various steps of exocytosis in hormone  
458 secretion beyond the previously known simple vesicle fusion step of the immune system  
459 (Huynh et al., 2004). We then determined the crystal structure of PTP-MEG2 in complex with  
460 the pY<sup>83</sup> phospho-segment of the NSF, the key energy provider for disassembling fusion-  
461 incompetent cis SNARE complexes in the process of vesicle fusion in immunocytes (Huynh et  
462 al., 2004). The complex structure not only revealed the structural rearrangement after PTP-  
463 MEG2 in response to substrate binding, identifying Q<sup>559</sup>:D<sup>335</sup> as the key pair for substrate  
464 specificity of the pY+1 site, but also provided clues that PTP-MEG2 regulated the initial  
465 opening of the fusion pore through another unknown substrate. Fortunately, we were able to  
466 deduce the signature of the pY+1 and pY+2 positions of this unknown substrate by carefully  
467 inspecting the PTP-MEG2/phospho-NSF-E<sup>79</sup>-pY<sup>83</sup>-K<sup>87</sup> complex structure and analysing the  
468 functional data of the PTP-MEG2 interface mutants. Further bioinformatics studies and cellular  
469 and physiological experiments enabled us to discover that PTP-MEG2 regulates the initial  
470 opening of the fusion pore by modulating the tyrosine phosphorylation states of MUNC18-1 at  
471 the pY<sup>145</sup> site. Therefore, we have revealed that PTP-MEG2 regulates different steps of the  
472 exocytosis processes via distinct substrates. PTP-MEG2 regulates the vesicle size and vesicle-  
473 vesicle fusion step by dephosphorylating NSF at its NSF-pY<sup>83</sup> site, whereas it regulates the  
474 process of large-dense-core vesicle fusion pore initiation and expansion by controlling  
475 MUNC18-1 at the pY<sup>145</sup> site. Moreover, our studies highlight that the combination of structural  
476 determination and functional delineation of the interface mutants of the protein complex is a  
477 powerful approach to characterizing the signalling events and identifying unknown downstream  
478 signalling molecules.

479 Fusion pore opening and expansion is thought to be a complex process requiring the  
480 docking of apposed lipid bilayers and involvement of multiple proteins to form a hemi-fusion



481 diaphragm including SNAREs, MUNC18-1, and DYNAMIN (Hernandez et al., 2012, Sudhof  
482 and Rothman, 2009, Baker and Hughson, 2016, Zhao et al., 2016, Mattila et al., 2015, Jones et  
483 al., 2017). Dissection of the molecular mechanism underlying pore fusion dynamics in  
484 exocytosis is challenging because direct observation of this process is difficult to achieve due  
485 to the short expansion time and the tiny size of the pore (Baker and Hughson, 2016, Gaisano,  
486 2017, Hong and Lev, 2014). MUNC18-1 and its closely related subfamily members have been  
487 demonstrated to participate in several processes during vesicle secretion by interacting with  
488 SNAREs, such as docking, priming and vesicle fusion (Korteweg et al., 2005, Fisher et al.,  
489 2001, Gulyas-Kovacs et al., 2007, Meijer et al., 2018, He et al., 2017, Chai et al., 2016, Sitarska  
490 et al., 2017, Cijssouw et al., 2014, Ma et al., 2015, Ma et al., 2013). Importantly, the tyrosine  
491 phosphorylation of MUNC18-1 at Y<sup>473</sup> was recently reported as a key step in modulating vesicle  
492 priming by inhibiting synaptic transmission and preventing SNARE assembly (Meijer et al.,  
493 2018). In addition, the tyrosine phosphorylation of MUNC18c on Y<sup>521</sup> was essential for the  
494 dissociation of MUNC18c and SYNTAXIN4 (Umahara et al., 2008). Moreover, the  
495 dephosphorylation of MUNC18-1-Y<sup>145</sup> was suggested to be essential in maintaining the  
496 association between MUNC18-1 and SYNTAXIN1 (Lim et al., 2013), although its  
497 physiological relevance in exocytosis is not evaluated, and the endogenous modulator is not  
498 accurately defined. In the present study, we demonstrated that the MUNC18-1 Y<sup>145</sup>E phospho-  
499 mimic mutation, but not the non-phosphorylated mutation Y<sup>145</sup>F, significantly decreased the  
500 PSF and the SAF probability. Consistently, only the specific PTP-MEG2 mutations that affect  
501 its activity towards MUNC18-1 reduced the PSF probability. The structural analysis of PTP-  
502 MEG2 in complex with MUNC18-1-pY<sup>145</sup> and the enzymatic analysis further confirmed these  
503 observations. Collectively, these results indicate that the tyrosine phosphorylation of MUNC18-  
504 1 at its Y<sup>145</sup> site and its dephosphorylation by PTP-MEG2 play essential roles in the regulation  
505 of the fusion pore opening process. Notably, the MUNC18-1 Y<sup>145</sup>H mutation is a known SNP  
506 that is associated with epileptic encephalopathy (Stamberger et al., 2017). Y<sup>145</sup>H behaves  
507 similarly to the MUNC18-1 phosphorylation mimic mutant Y<sup>145</sup>E by disrupting its interaction  
508 with SYNTAXIN1 and reducing the probability of PSF elicited by AngII in primary chromaffin  
509 cells. This observation provided a clue for the pathological effects of the MUNC18-1 Y<sup>145</sup>H  
510 mutation. In addition to MUNC18-1, we found that VAMP7 interacted with PTP-MEG2 via its  
511 Y<sup>45</sup> tyrosine phosphorylation site. DYNAMIN-1, PASCIN1 and SNAP25 are also potential  
512 PTP-MEG2 substrates depending on specific cellular contexts. The functions of VAMP7  
513 phosphorylation at the Y<sup>45</sup> site and its dephosphorylation by PTP-MEG2, the interaction of  
514 PTP-MEG2 with DYNAMIN-1, etc. in the exocytosis process await further investigation.

515 Finally, by solving the two crystal structures of PTP-MEG2 in complex with two substrates,  
516 the phospho-NSF-E<sup>79</sup>-pY<sup>83</sup>-K<sup>87</sup> segment and the phospho-MUNC18-1-E<sup>141</sup>-pY<sup>145</sup>-S<sup>149</sup> segment,  
517 we revealed that PTP-MEG2 recognized these functionally different substrates through distinct



518 structural bases. Whereas K<sup>411</sup>, Y<sup>471</sup> and I<sup>519</sup> contributed most to the selective interaction of  
519 PTP-MEG2 with NSF, another set of residues, including V<sup>393</sup> and R<sup>410</sup>, mediated the specific  
520 binding of PTP-MEG2 to MUNC18-1 (Fig. 8B). Most importantly, mutating Y<sup>471</sup> and I<sup>519</sup> to A  
521 significantly decreased the activity of PTP-MEG2 towards the phospho-NSF-E<sup>79</sup>-pY<sup>83</sup>-K<sup>87</sup>  
522 segment but not the phospho-MUNC18-1-E<sup>141</sup>-pY<sup>145</sup>-S<sup>149</sup> segment. The biochemical data  
523 agreed well with the functional data that PTP-MEG2 Y<sup>471</sup>A and I<sup>519</sup>A of PTP-MEG2 affected  
524 only the vesicle fusion procedure but not the fusion pore opening and expansion processes.  
525 These data not only indicate that PTP-MEG2 regulates different steps of exocytosis through  
526 different substrates in an explicit temporal and spatial context but also afforded important  
527 guidance for the design of selective PTP-MEG2 inhibitors according to the different interfaces  
528 between PTP-MEG2 and its substrates to explicitly regulate specific physiological processes,  
529 supporting the hypothesis of “substrate-specific PTP inhibitors” (Doody and Bottini, 2014).  
530 The design of such inhibitors will certainly help to delineate specific roles of PTP-MEG2 in  
531 different physiological and pathological processes.

532 In conclusion, we have found that PTP-MEG2 regulates two different processes of  
533 exocytosis during catecholamine secretion, namely, vesicle fusion and the opening and  
534 extension of the fusion pore, through two different substrates with distinct structural bases. We  
535 achieved this knowledge by determining the complex structure and performing functional  
536 delineation of the protein complex interface mutants. The present study supports the hypothesis  
537 that the tyrosine phosphorylation of secretion machinery proteins is an important category of  
538 regulatory events for hormone secretion and is explicitly regulated by protein tyrosine  
539 phosphatases, such as PTP-MEG2. Dissecting the molecular and structural mechanisms of such  
540 modulation processes will provide an in-depth understanding of the exocytosis process and  
541 guide further therapeutic development for exocytosis-related diseases, such as epileptic  
542 encephalopathy (Stamberger et al., 2017).

543

## 544 **ACKNOWLEDGEMENTS**

545

546 We thank Dr Michael Xi Zhu for stimulating discussions and critical reading of the manuscript.  
547 We thank Dr Zhongliang Zhu of University of Science and Technology of China, for his help  
548 in the crystal data collection, analysis and valuable discussion. We thank Yanmei Lu from  
549 Shandong jiaotong hospital, for her help with Transmission electron microscopy analysis. We  
550 thank Daolai Zhang and Mingliang Ma for their technical assistance in lentivirus packaging.  
551 We thank Yujing Sun and Zhixin Liu for their technical assistance in electrochemical recording.  
552 We acknowledge support from the National Key Basic Research Program of China Grant  
553 2018YFC1003600 (to X.Y. and J.-P.S.), the National Natural Science Foundation of China

554 Grant 81773704 (to J.-P.S.), Grant 31701230 (to Z.Y.) and Grant 81601668 (to Y.-F.X.), the  
555 Shandong Provincial Natural Science Foundation, China (ZR2017BC045 to Z.Y.), the National  
556 Science Fund for Distinguished Young Scholars Grant 81825022 (to J.-P.S.), the National  
557 Science Fund for Excellent Young Scholars Grant 81822008 (to X. Y.) and the Rolling program  
558 of ChangJiang Scholars and Innovative Research Team in University Grant IRT\_17R68 (to Y.  
559 S.).

560

## 561 **AUTHOR CONTRIBUTIONS:**

562 J.-P.S. and X.Y. conceived the whole research and initiated the project. J.-P.S., X.Y., Y.-  
563 F.X. and X.C. designed all of the experiments. J.-P.S. and X.Y. supervised the overall project  
564 design and execution. X.C., Y.-F.X., Z.Y., X.Y. and J.-P.S. participated in data analysis and  
565 interpretation. C.-H.L. and Y.-J.W. performed electrochemical experiments. M.C., Z.Y., P.X.,  
566 K.-S.L. and Q.L. performed cell biology, molecular biology and biochemistry experiments. Z.-  
567 Y.Z. and S.Z. synthesized and purified the Compound 7 (PTP-MEG2 inhibitor) for us as a gift.  
568 X.-Z.Y. and Z.-L.J. performed substrate bioinformatics screening. Z.-Y.Z., W.-D.Z. and C.-  
569 H.W., C.W. and Y.-M.S. provided insightful idea and experimental designs. J.-P.S., Y.-F.X.,  
570 X.C., and X.Y. wrote the manuscript. All of the authors have seen and commented on the  
571 manuscript.

572

573

## 574 **DECLARATION OF INTERESTS**

575 The authors declare no competing interests.

576

## 577 **REFERENCE**

578

579 ALONSO, A., SASIN, J., BOTTINI, N., FRIEDBERG, I., FRIEDBERG, I., OSTERMAN, A., GODZIK, A., HUNTER,  
580 T., DIXON, J. & MUSTELIN, T. 2004. Protein tyrosine phosphatases in the human genome. *Cell*, 117, 699-  
581 711.

582 ALVAREZ DE TOLEDO, G., FERNANDEZ-CHACON, R. & FERNANDEZ, J. M. 1993. Release of secretory  
583 products during transient vesicle fusion. *Nature*, 363, 554-8.

584 BAKER, R. W. & HUGHSON, F. M. 2016. Chaperoning SNARE assembly and disassembly. *Nat Rev Mol Cell*  
585 *Biol*, 17, 465-79.

586 BARR, A. J., UGOCHUKWU, E., LEE, W. H., KING, O. N., FILIPPAKOPOULOS, P., ALFANO, I., SAVITSKY, P.,  
587 BURGESS-BROWN, N. A., MULLER, S. & KNAPP, S. 2009. Large-scale structural analysis of the classical  
588 human protein tyrosine phosphatome. *Cell*, 136, 352-63.

589 CHAI, Y. J., SIERECKI, E., TOMATIS, V. M., GORMAL, R. S., GILES, N., MORROW, I. C., XIA, D., GOTZ, J.,  
590 PARTON, R. G., COLLINS, B. M., GAMBIN, Y. & MEUNIER, F. A. 2016. Munc18-1 is a molecular chaperone  
591 for alpha-synuclein, controlling its self-replicating aggregation. *J Cell Biol*, 214, 705-18.

592 CHEN, X. K., WANG, L. C., ZHOU, Y., CAI, Q., PRAKRIYA, M., DUAN, K. L., SHENG, Z. H., LINGLE, C. & ZHOU,

593 Z. 2005. Activation of GPCRs modulates quantal size in chromaffin cells through G(betagamma) and PKC.  
594 *Nat Neurosci*, 8, 1160-8.

595 CHO, C. Y., KOO, S. H., WANG, Y., CALLAWAY, S., HEDRICK, S., MAK, P. A., ORTH, A. P., PETERS, E. C., SAEZ,  
596 E., MONTMINY, M., SCHULTZ, P. G. & CHANDA, S. K. 2006. Identification of the tyrosine phosphatase  
597 PTP-MEG2 as an antagonist of hepatic insulin signaling. *Cell Metab*, 3, 367-78.

598 CIJSOUW, T., WEBER, J. P., BROEKE, J. H., BROEK, J. A., SCHUT, D., KROON, T., SAARLOOS, I., VERHAGE,  
599 M. & TOONEN, R. F. 2014. Munc18-1 redistributes in nerve terminals in an activity- and PKC-dependent  
600 manner. *J Cell Biol*, 204, 759-75.

601 DITTMAN, J. S. & RYAN, T. A. 2019. The control of release probability at nerve terminals. *Nat Rev*  
602 *Neurosci*, 20, 177-186.

603 DOODY, K. M. & BOTTINI, N. 2014. "PEST control": regulation of molecular barcodes by tyrosine  
604 phosphatases. *Cell Res*, 24, 1027-8.

605 FISHER, R. J., PEVSNER, J. & BURGOYNE, R. D. 2001. Control of fusion pore dynamics during exocytosis  
606 by Munc18. *Science*, 291, 875-8.

607 GABEL, M., DELAVOIE, F., ROYER, C., TAHOULY, T., GASMAN, S., BADER, M. F., VITALE, N. & CHASSEROT-  
608 GOLAZ, S. 2019. Phosphorylation cycling of Annexin A2 Tyr23 is critical for calcium-regulated exocytosis  
609 in neuroendocrine cells. *Biochim Biophys Acta Mol Cell Res*, 1866, 1207-1217.

610 GAISANO, H. Y. 2017. Recent new insights into the role of SNARE and associated proteins in insulin  
611 granule exocytosis. *Diabetes Obes Metab*, 19 Suppl 1, 115-123.

612 GU, M., WARSHAWSKY, I. & MAJERUS, P. W. 1992. Cloning and expression of a cytosolic megakaryocyte  
613 protein-tyrosine-phosphatase with sequence homology to retinaldehyde-binding protein and yeast  
614 SEC14p. *Proc Natl Acad Sci U S A*, 89, 2980-4.

615 GULYAS-KOVACS, A., DE WIT, H., MILOSEVIC, I., KOCHUBEY, O., TOONEN, R., KLINGAUF, J., VERHAGE, M.  
616 & SORENSEN, J. B. 2007. Munc18-1: sequential interactions with the fusion machinery stimulate vesicle  
617 docking and priming. *J Neurosci*, 27, 8676-86.

618 HARADA, K., MATSUOKA, H., MIYATA, H., MATSUI, M. & INOUE, M. 2015. Identification of muscarinic  
619 receptor subtypes involved in catecholamine secretion in adrenal medullary chromaffin cells by genetic  
620 deletion. *Br J Pharmacol*, 172, 1348-59.

621 HE, E., WIERDA, K., VAN WESTEN, R., BROEKE, J. H., TOONEN, R. F., CORNELISSE, L. N. & VERHAGE, M.  
622 2017. Munc13-1 and Munc18-1 together prevent NSF-dependent de-priming of synaptic vesicles. *Nat*  
623 *Commun*, 8, 15915.

624 HERNANDEZ, J. M., STEIN, A., BEHRMANN, E., RIEDEL, D., CYPIONKA, A., FARSI, Z., WALLA, P. J., RAUNSER,  
625 S. & JAHN, R. 2012. Membrane fusion intermediates via directional and full assembly of the SNARE  
626 complex. *Science*, 336, 1581-4.

627 HONG, W. & LEV, S. 2014. Tethering the assembly of SNARE complexes. *Trends Cell Biol*, 24, 35-43.

628 HORNBECK, P. V., ZHANG, B., MURRAY, B., KORNHAUSER, J. M., LATHAM, V. & SKRZYPEK, E. 2015.  
629 PhosphoSitePlus, 2014: mutations, PTMs and recalibrations. *Nucleic Acids Res*, 43, D512-20.

630 HU, S. H., CHRISTIE, M. P., SAEZ, N. J., LATHAM, C. F., JARROTT, R., LUA, L. H., COLLINS, B. M. & MARTIN,  
631 J. L. 2011. Possible roles for Munc18-1 domain 3a and Syntaxin1 N-peptide and C-terminal anchor in  
632 SNARE complex formation. *Proc Natl Acad Sci U S A*, 108, 1040-5.

633 HUYNH, H., BOTTINI, N., WILLIAMS, S., CHEREPANOV, V., MUSUMECI, L., SAITO, K., BRUCKNER, S.,  
634 VACHON, E., WANG, X., KRUGER, J., CHOW, C. W., PELLECCIA, M., MONOSOV, E., GREER, P. A., TRIMBLE,  
635 W., DOWNEY, G. P. & MUSTELIN, T. 2004. Control of vesicle fusion by a tyrosine phosphatase. *Nat Cell*  
636 *Biol*, 6, 831-9.

637 JEWELL, J. L., OH, E., RAMALINGAM, L., KALWAT, M. A., TAGLIABRACCI, V. S., TACKETT, L., ELMENDORF,  
638 J. S. & THURMOND, D. C. 2011. Munc18c phosphorylation by the insulin receptor links cell signaling  
639 directly to SNARE exocytosis. *J Cell Biol*, 193, 185-99.

640 JONES, D. M., ALVAREZ, L. A., NOLAN, R., FERRIZ, M., SAINZ URRUELA, R., MASSANA-MUNOZ, X., NOVAK-  
641 KOTZER, H., DUSTIN, M. L. & PADILLA-PARRA, S. 2017. Dynamin-2 Stabilizes the HIV-1 Fusion Pore with  
642 a Low Oligomeric State. *Cell Rep*, 18, 443-453.

643 KORTEWEG, N., MAIA, A. S., THOMPSON, B., ROUBOS, E. W., BURBACH, J. P. & VERHAGE, M. 2005. The  
644 role of Munc18-1 in docking and exocytosis of peptide hormone vesicles in the anterior pituitary. *Biol*  
645 *Cell*, 97, 445-55.

646 LAIDLAW, K. M. E., LIVINGSTONE, R., AL-TOBI, M., BRYANT, N. J. & GOULD, G. W. 2017. SNARE  
647 phosphorylation: a control mechanism for insulin-stimulated glucose transport and other regulated  
648 exocytic events. *Biochem Soc Trans*, 45, 1271-1277.

649 LI, H., YANG, F., LIU, C., XIAO, P., XU, Y., LIANG, Z., LIU, C., WANG, H., WANG, W., ZHENG, W., ZHANG, W.,  
650 MA, X., HE, D., SONG, X., CUI, F., XU, Z., YI, F., SUN, J. P. & YU, X. 2016. Crystal Structure and Substrate  
651 Specificity of PTPN12. *Cell Rep*, 15, 1345-58.

652 LIM, S. H., MOON, J., LEE, M. & LEE, J. R. 2013. PTPRT regulates the interaction of Syntaxin-binding  
653 protein 1 with Syntaxin 1 through dephosphorylation of specific tyrosine residue. *Biochem Biophys Res*  
654 *Commun*, 439, 40-6.

655 LIU, C. H., GONG, Z., LIANG, Z. L., LIU, Z. X., YANG, F., SUN, Y. J., MA, M. L., WANG, Y. J., JI, C. R., WANG,  
656 Y. H., WANG, M. J., CUI, F. A., LIN, A., ZHENG, W. S., HE, D. F., QU, C. X., XIAO, P., LIU, C. Y., THOMSEN, A.  
657 R., JOSEPH CAHILL, T., 3RD, KAHSAL, A. W., YI, F., XIAO, K. H., XUE, T., ZHOU, Z., YU, X. & SUN, J. P. 2017.  
658 Arrestin-biased AT1R agonism induces acute catecholamine secretion through TRPC3 coupling. *Nat*  
659 *Commun*, 8, 14335.

660 MA, C., SU, L., SEVEN, A. B., XU, Y. & RIZO, J. 2013. Reconstitution of the vital functions of Munc18 and  
661 Munc13 in neurotransmitter release. *Science*, 339, 421-5.

662 MA, L., REBANE, A. A., YANG, G., XI, Z., KANG, Y., GAO, Y. & ZHANG, Y. 2015. Munc18-1-regulated stage-  
663 wise SNARE assembly underlying synaptic exocytosis. *Elife*, 4.

664 MAGADMI, R., MESZAROS, J., DAMANHOURI, Z. A. & SEWARD, E. P. 2019. Secretion of Mast Cell  
665 Inflammatory Mediators Is Enhanced by CADM1-Dependent Adhesion to Sensory Neurons. *Front Cell*  
666 *Neurosci*, 13, 262.

667 MATTILA, J. P., SHNYROVA, A. V., SUNDBORGER, A. C., HORTELANO, E. R., FUHRMANS, M., NEUMANN,  
668 S., MULLER, M., HINSHAW, J. E., SCHMID, S. L. & FROLOV, V. A. 2015. A hemi-fission intermediate links  
669 two mechanistically distinct stages of membrane fission. *Nature*, 524, 109-113.

670 MEIJER, M., DORR, B., LAMMERTSE, H. C., BLITHIKIOTI, C., VAN WEERING, J. R., TOONEN, R. F., SOLLNER,  
671 T. H. & VERHAGE, M. 2018. Tyrosine phosphorylation of Munc18-1 inhibits synaptic transmission by  
672 preventing SNARE assembly. *EMBO J*, 37, 300-320.

673 NEHER, E. & BROSE, N. 2018. Dynamically Primed Synaptic Vesicle States: Key to Understand Synaptic  
674 Short-Term Plasticity. *Neuron*, 100, 1283-1291.

675 OAKIE, A. & WANG, R. 2018. beta-Cell Receptor Tyrosine Kinases in Controlling Insulin Secretion and  
676 Exocytotic Machinery: c-Kit and Insulin Receptor. *Endocrinology*, 159, 3813-3821.

677 ORTSATER, H., GRANKVIST, N., HONKANEN, R. E. & SJOHOLM, A. 2014. Protein phosphatases in  
678 pancreatic islets. *J Endocrinol*, 221, R121-44.

679 PAN, C., LIU, H. D., GONG, Z., YU, X., HOU, X. B., XIE, D. D., ZHU, X. B., LI, H. W., TANG, J. Y., XU, Y. F., YU,  
680 J. Q., ZHANG, L. Y., FANG, H., XIAO, K. H., CHEN, Y. G., WANG, J. Y., PANG, Q., CHEN, W. & SUN, J. P. 2013.

681 Cadmium is a potent inhibitor of PPM phosphatases and targets the M1 binding site. *Sci Rep*, 3, 2333.  
682 SEINO, S., TAKAHASHI, H., FUJIMOTO, W. & SHIBASAKI, T. 2009. Roles of cAMP signalling in insulin  
683 granule exocytosis. *Diabetes Obes Metab*, 11 Suppl 4, 180-8.  
684 SITARSKA, E., XU, J., PARK, S., LIU, X., QUADE, B., STEPIEN, K., SUGITA, K., BRAUTIGAM, C. A., SUGITA, S.  
685 & RIZO, J. 2017. Autoinhibition of Munc18-1 modulates synaptobrevin binding and helps to enable  
686 Munc13-dependent regulation of membrane fusion. *Elife*, 6.  
687 SOARES, H., HENRIQUES, R., SACHSE, M., VENTIMIGLIA, L., ALONSO, M. A., ZIMMER, C., THOULOZE,  
688 M. I. & ALCOVER, A. 2013. Regulated vesicle fusion generates signaling nanoterritories that control T  
689 cell activation at the immunological synapse. *J Exp Med*, 210, 2415-33.  
690 STAMBERGER, H., WECKHUYSEN, S. & DE JONGHE, P. 2017. STXBP1 as a therapeutic target for epileptic  
691 encephalopathy. *Expert Opin Ther Targets*, 21, 1027-1036.  
692 SUDHOF, T. C. 2004. The synaptic vesicle cycle. *Annu Rev Neurosci*, 27, 509-47.  
693 SUDHOF, T. C. 2013. Neurotransmitter release: the last millisecond in the life of a synaptic vesicle.  
694 *Neuron*, 80, 675-90.  
695 SUDHOF, T. C. & ROTHMAN, J. E. 2009. Membrane fusion: grappling with SNARE and SM proteins.  
696 *Science*, 323, 474-7.  
697 SZKLARCZYK, D., FRANCESCHINI, A., WYDER, S., FORSLUND, K., HELLER, D., HUERTA-CEPAS, J.,  
698 SIMONOVIC, M., ROTH, A., SANTOS, A., TSAFOU, K. P., KUHN, M., BORK, P., JENSEN, L. J. & VON MERING,  
699 C. 2015. STRING v10: protein-protein interaction networks, integrated over the tree of life. *Nucleic Acids*  
700 *Res*, 43, D447-52.  
701 TESCHEMACHER, A. G. & SEWARD, E. P. 2000. Bidirectional modulation of exocytosis by angiotensin II  
702 involves multiple G-protein-regulated transduction pathways in chromaffin cells. *J Neurosci*, 20, 4776-  
703 85.  
704 THUL, P. J., AKESSON, L., WIKING, M., MAHDESSIAN, D., GELADAKI, A., AIT BLAL, H., ALM, T., ASPLUND,  
705 A., BJORK, L., BRECKELS, L. M., BACKSTROM, A., DANIELSSON, F., FAGERBERG, L., FALL, J., GATTO, L.,  
706 GNANN, C., HOBER, S., HJELMARE, M., JOHANSSON, F., LEE, S., LINDSKOG, C., MULDER, J., MULVEY, C.  
707 M., NILSSON, P., OKSVOLD, P., ROCKBERG, J., SCHUTTEN, R., SCHWENK, J. M., SIVERTSSON, A., SJOSTEDT,  
708 E., SKOGS, M., STADLER, C., SULLIVAN, D. P., TEGEL, H., WINSNES, C., ZHANG, C., ZWAHLEN, M.,  
709 MARDINOGLU, A., PONTEN, F., VON FEILITZEN, K., LILLEY, K. S., UHLEN, M. & LUNDBERG, E. 2017. A  
710 subcellular map of the human proteome. *Science*, 356.  
711 TONKS, N. K. 2006. Protein tyrosine phosphatases: from genes, to function, to disease. *Nat Rev Mol Cell*  
712 *Biol*, 7, 833-46.  
713 UMAHARA, M., OKADA, S., YAMADA, E., SAITO, T., OHSHIMA, K., HASHIMOTO, K., YAMADA, M., SHIMIZU,  
714 H., PESSIN, J. E. & MORI, M. 2008. Tyrosine phosphorylation of Munc18c regulates platelet-derived  
715 growth factor-stimulated glucose transporter 4 translocation in 3T3L1 adipocytes. *Endocrinology*, 149,  
716 40-9.  
717 VILAR, S., COZZA, G. & MORO, S. 2008. Medicinal chemistry and the molecular operating environment  
718 (MOE): application of QSAR and molecular docking to drug discovery. *Curr Top Med Chem*, 8, 1555-72.  
719 WANG, H. M., XU, Y. F., NING, S. L., YANG, D. X., LI, Y., DU, Y. J., YANG, F., ZHANG, Y., LIANG, N., YAO, W.,  
720 ZHANG, L. L., GU, L. C., GAO, C. J., PANG, Q., CHEN, Y. X., XIAO, K. H., MA, R., YU, X. & SUN, J. P. 2014.  
721 The catalytic region and PEST domain of PTPN18 distinctly regulate the HER2 phosphorylation and  
722 ubiquitination barcodes. *Cell Res*, 24, 1067-90.  
723 WANG, Y., VACHON, E., ZHANG, J., CHEREPANOV, V., KRUGER, J., LI, J., SAITO, K., SHANNON, P., BOTTINI,  
724 N., HUYNH, H., NI, H., YANG, H., MCKERLIE, C., QUAGGIN, S., ZHAO, Z. J., MARSDEN, P. A., MUSTELIN, T.,

- 725 SIMINOVITCH, K. A. & DOWNEY, G. P. 2005. Tyrosine phosphatase MEG2 modulates murine  
726 development and platelet and lymphocyte activation through secretory vesicle function. *J Exp Med*, 202,  
727 1587-97.
- 728 WEI, C. H., KAO, H. Y. & LU, Z. 2013. PubTator: a web-based text mining tool for assisting biocuration.  
729 *Nucleic Acids Res*, 41, W518-22.
- 730 WU, L. G., HAMID, E., SHIN, W. & CHIANG, H. C. 2014. Exocytosis and endocytosis: modes, functions,  
731 and coupling mechanisms. *Annu Rev Physiol*, 76, 301-31.
- 732 YANG, X., WANG, S., SHENG, Y., ZHANG, M., ZOU, W., WU, L., KANG, L., RIZO, J., ZHANG, R., XU, T. & MA,  
733 C. 2015. Syntaxin opening by the MUN domain underlies the function of Munc13 in synaptic-vesicle  
734 priming. *Nat Struct Mol Biol*, 22, 547-54.
- 735 YU, X., CHEN, M., ZHANG, S., YU, Z. H., SUN, J. P., WANG, L., LIU, S., IMASAKI, T., TAKAGI, Y. & ZHANG, Z.  
736 Y. 2011. Substrate specificity of lymphoid-specific tyrosine phosphatase (Lyp) and identification of Src  
737 kinase-associated protein of 55 kDa homolog (SKAP-HOM) as a Lyp substrate. *J Biol Chem*, 286, 30526-  
738 34.
- 739 YU, Z. H. & ZHANG, Z. Y. 2018. Regulatory Mechanisms and Novel Therapeutic Targeting Strategies for  
740 Protein Tyrosine Phosphatases. *Chem Rev*, 118, 1069-1091.
- 741 ZHANG, D., MARLIN, M. C., LIANG, Z., AHMAD, M., ASHPOLE, N. M., SONNTAG, W. E., ZHAO, Z. J. & LI, G.  
742 2016. The Protein Tyrosine Phosphatase MEG2 Regulates the Transport and Signal Transduction of  
743 Tropomyosin Receptor Kinase A. *J Biol Chem*, 291, 23895-23905.
- 744 ZHANG, D. L., SUN, Y. J., MA, M. L., WANG, Y. J., LIN, H., LI, R. R., LIANG, Z. L., GAO, Y., YANG, Z., HE, D. F.,  
745 LIN, A., MO, H., LU, Y. J., LI, M. J., KONG, W., CHUNG, K. Y., YI, F., LI, J. Y., QIN, Y. Y., LI, J., THOMSEN, A. R.  
746 B., KAHSAI, A. W., CHEN, Z. J., XU, Z. G., LIU, M., LI, D., YU, X. & SUN, J. P. 2018. Gq activity- and beta-  
747 arrestin-1 scaffolding-mediated ADGRG2/CFTR coupling are required for male fertility. *Elife*, 7.
- 748 ZHANG, S., LIU, S., TAO, R., WEI, D., CHEN, L., SHEN, W., YU, Z. H., WANG, L., JONES, D. R., DONG, X. C. &  
749 ZHANG, Z. Y. 2012. A highly selective and potent PTP-MEG2 inhibitor with therapeutic potential for type  
750 2 diabetes. *J Am Chem Soc*, 134, 18116-24.
- 751 ZHAO, W. D., HAMID, E., SHIN, W., WEN, P. J., KRSTOFIAK, E. S., VILLARREAL, S. A., CHIANG, H. C.,  
752 KACHAR, B. & WU, L. G. 2016. Hemi-fused structure mediates and controls fusion and fission in live cells.  
753 *Nature*, 534, 548-52.
- 754 ZHOU, Z., MISLER, S. & CHOW, R. H. 1996. Rapid fluctuations in transmitter release from single vesicles  
755 in bovine adrenal chromaffin cells. *Biophys J*, 70, 1543-52.

756  
757  
758  
759  
760  
761  
762  
763  
764

## 765 **FIGURE LEGENDS**



# Figure 1

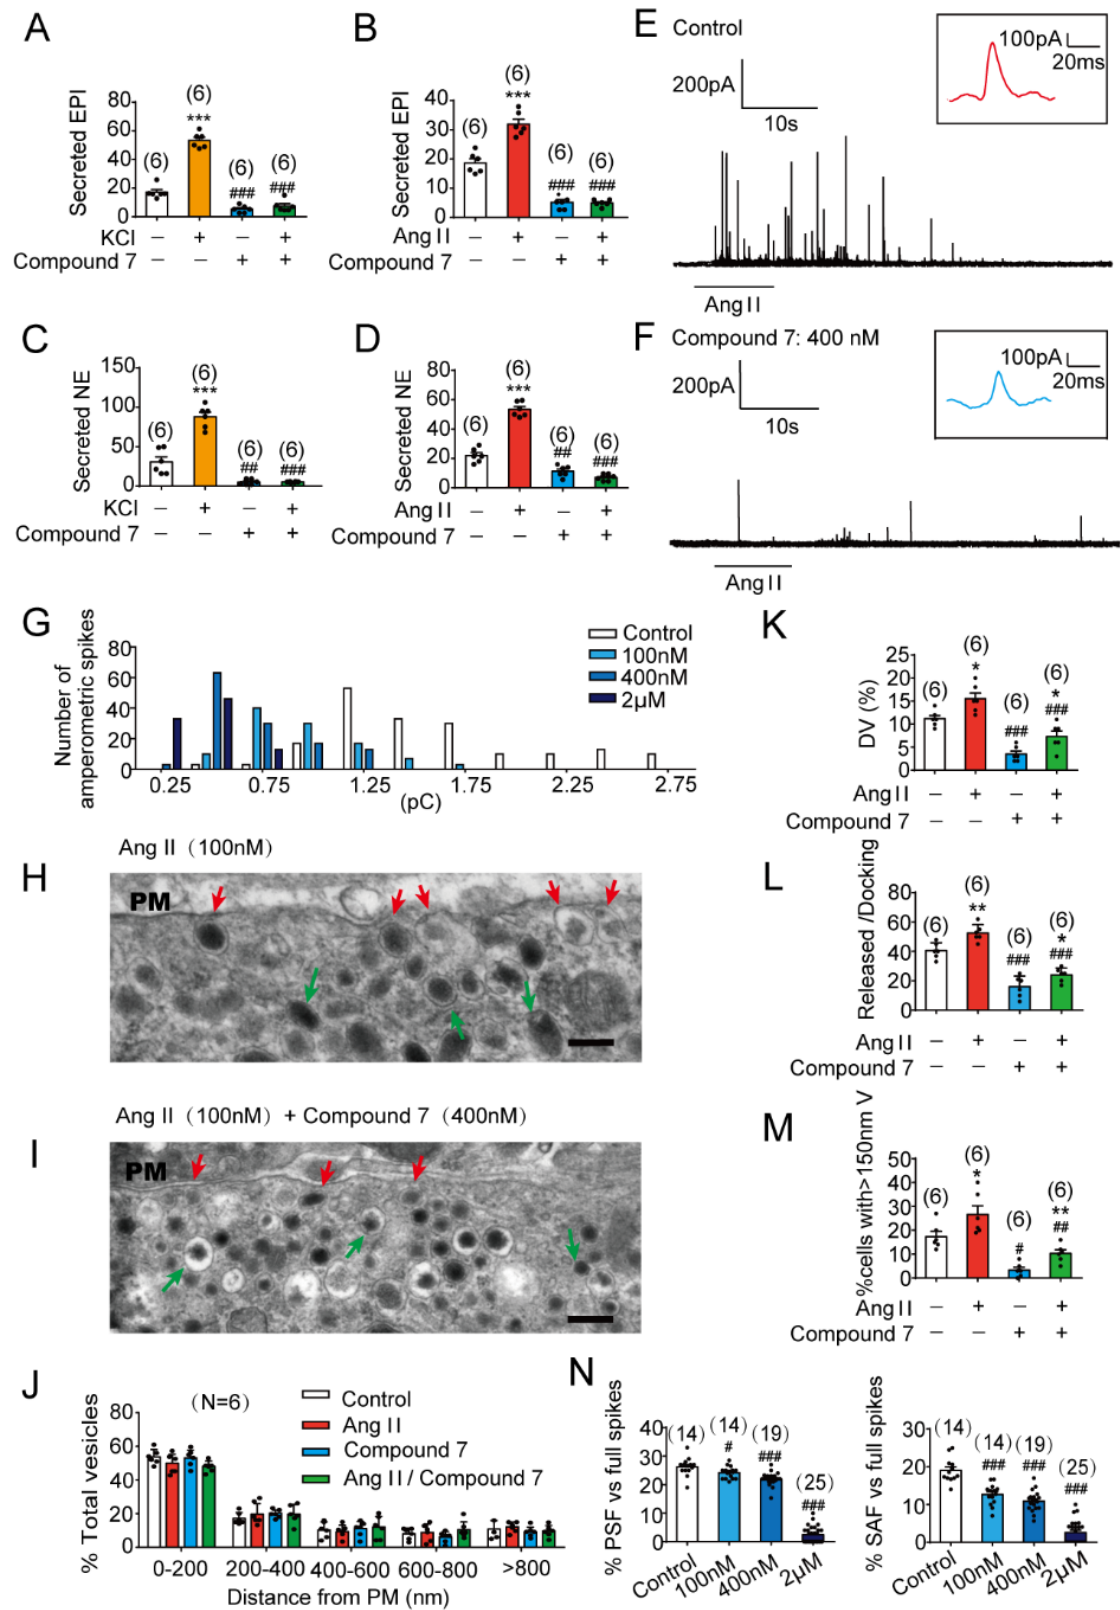

766

767

768

**Figure 1. Inhibition of PTP-MEG2 reduced the spike amplitude and 'foot' probability of**

769 **catecholamine secretion.**

770 (A-D). The epinephrine (A-B) or norepinephrine (C-D) secreted from the adrenal medulla was  
771 measured after stimulation with high KCl (70 mM) (A,C) or Angiotensin II (100 nM) (B,D) for  
772 1 min, with or without pre-incubation with a specific PTP-MEG2 inhibitor (2  $\mu$ M) for 2 hours.  
773 Data were obtained from 3 independent experiments and displayed as the mean  $\pm$  SEM. \*\*,  
774  $P < 0.01$ ; \*\*\*,  $P < 0.001$ : cells stimulated with KCl or AngII compared with un-stimulated cells.  
775 #,  $P < 0.05$ ; ##,  $P < 0.01$ : cells pre-incubated with PTP-MEG2 inhibitors compared with control  
776 vehicles.

777 (E-F). Angiotensin II (AngII, 100 nM) induced amperometric spikes by primary mouse  
778 chromaffin cells after incubation with PTP-MEG2 inhibitor at different concentrations.

779 (G). The distribution of the quantal size of AngII (100 nM)-induced amperometric spikes by  
780 primary chromaffin cells after incubation with different concentrations of PTP-MEG2 inhibitor.  
781 Histograms show the number of amperometric spikes of different quantal sizes. Control: 182  
782 spikes were calculated from 14 cells. 100 nM: 107 spikes were calculated from 14 cells. 400  
783 nM: 126 spikes were calculated from 19 cells. 2  $\mu$ M: 92 spikes were calculated from 25 cells.

784 (H and I). Secretory vesicles of primary chromaffin cells were examined by transmission  
785 electron microscopy before or after 100 nM AngII stimulation, with or without pre-incubation  
786 with 400 nM Compound 7. Scale bars: H, I, 150 nm.

787 (J). Vesicle numbers according to different distances from the plasma membrane were  
788 calculated in the presence or absence of 100 nM AngII or 400 nM Compound 7. PM stands for  
789 plasma membrane.

790 (K). The vesicles undergoing docking were counted and compared between subgroups after  
791 incubation with 100 nM AngII or 400 nM Compound 7. DV stands for docking vesicles.

792 (L). The ratio of released/docking vesicles was compared in the presence or absence of 100 nM  
793 AngII or 400 nM Compound 7.

794 (M). The percentage of vesicles with diameters greater than 150 nm was measured after 100  
795 nM AngII stimulation or incubation with 400 nM Compound 7. Compound 7 significantly  
796 decreased vesicle size under AngII stimulation. In (K) (L) and (M), \* and \*\* indicate  $P < 0.05$   
797 and  $P < 0.01$ , respectively, compared with the control group. #, ## and ### indicate  $P < 0.05$ ,  
798  $< 0.01$  and  $< 0.001$  between incubated with the control vehicles and cells incubated with  
799 Compound 7. V stands for vesicles.

800 (N). The percentage of pre-spike foot (left panel) and stand-alone foot (right panel) were  
801 calculated after incubation with the indicated concentrations of Compound 7. \* indicates  
802  $P < 0.05$  compared with the control group. # indicates  $P < 0.05$  compared with the subgroup with  
803 AngII and without Compound 7. All statistical significance was calculated with one-way  
804 ANOVA. \* indicates  $P < 0.05$  and \*\*\* indicates  $P < 0.001$ .

805

## Figure 2

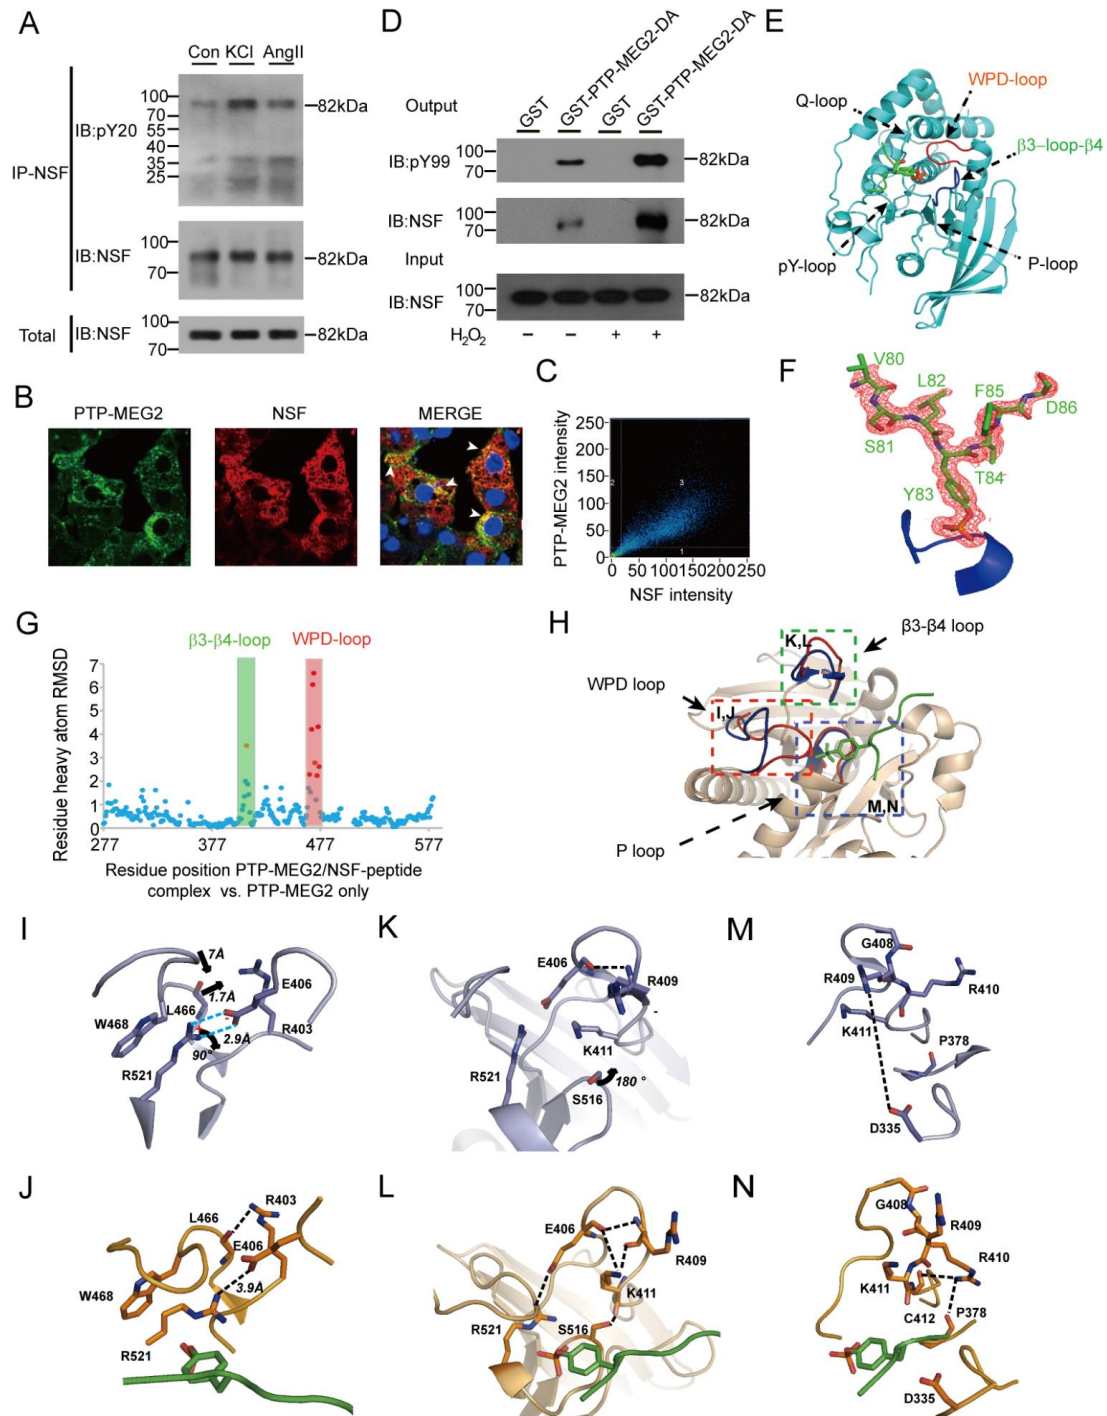

806

807

808 **Figure 2 Interaction of PTP-MEG2 and tyrosine-phosphorylated NSF in the medulla and**  
 809 **the crystal structure of the PTP-MEG2/phospho-NSF-segment complex.**

810 (A). NSF was phosphorylated after stimulation with Ang II or KCl. Adrenal medulla cells were  
 811 stimulated with 100 nM Ang II or 70 mM KCl for 1 min and lysed. NSF was  
 812 immunoprecipitated with a specific NSF antibody coated with Protein A/G beads. A pan-

813 phospho-tyrosine antibody pY<sup>20</sup> was used in Western blotting to detect the tyrosine-  
814 phosphorylated NSF in the adrenal medulla under different conditions.

815 (B). NSF was co-localized with PTP-MEG2 in the adrenal medulla. After stimulation with 100  
816 nM Ang II, NSF and PTP-MEG2 in the adrenal medulla were visualized with  
817 immunofluorescence.

818 (C). Analysis of PTP-MEG2 and NSF fluorescence intensities by Pearson's correlation analysis.  
819 The Pearson's correlation coefficient was 0.7.

820 (D). Phosphorylated NSF interacted with PTP-MEG2. PC12 cells were transfected with FLAG-  
821 NSF. After stimulation of the cells with 100  $\mu$ M H<sub>2</sub>O<sub>2</sub>, the potential PTP-MEG2 substrate in  
822 cell lysates was pulled down with GST-PTP-MEG2-D<sup>470</sup>A or GST control.

823 (E). The overall structure of PTP-MEG2-C<sup>515</sup>A/D<sup>470</sup>A in complex with the NSF-pY<sup>83</sup> phospho-  
824 segment.

825 (F). The 2Fo-Fc annealing omit map (contoured at 1.0 $\sigma$ ) around the NSF-pY<sup>83</sup> phospho-  
826 segment.

827 (G). Plot of distance RMSDs of individual residues between the crystal structures of the PTP-  
828 MEG2/NSF-pY<sup>83</sup> phospho-peptide complex and the PTP-MEG2 native protein (PDB:2PA5).

829 (H). Superposition of the PTP-MEG2/NSF-pY<sup>83</sup> phospho-peptide complex structure (red) on  
830 the PTP-MEG2 native protein structure (PDB:2PA5, blue). The structural rearrangement of the  
831 WPD loop and  $\beta$ 3-loop- $\beta$ 4 is highlighted.

832 (I and J). The closure of the WPD loop and corresponding conformational changes in the  
833 inactive state (I) and the active state (J) of PTP-MEG2. The rotation of R<sup>521</sup> leads to the  
834 movement of W<sup>468</sup> and a corresponding 7 Å movement of the WPD loop.

835 (K and L). The structural rearrangement of  $\beta$ 3-loop- $\beta$ 4 of PTP-MEG2 in the active state (L)  
836 compared with the inactive state (K). The disruption of the salt bridge between E<sup>406</sup> and R<sup>521</sup>  
837 contributed to the new conformational state of the N-terminal of  $\beta$ 3-loop- $\beta$ 4.

838 (M and N). The conformational change of the P-loop of the inactive state (M) and the active  
839 state of PTP-MEG2 in response to NSF-pY<sup>83</sup> segment binding (N). The disruption of the charge  
840 interaction between R<sup>409</sup> and D<sup>335</sup> resulted in the movement of the main chain from G<sup>408</sup> to K<sup>411</sup>.

## Figure 3

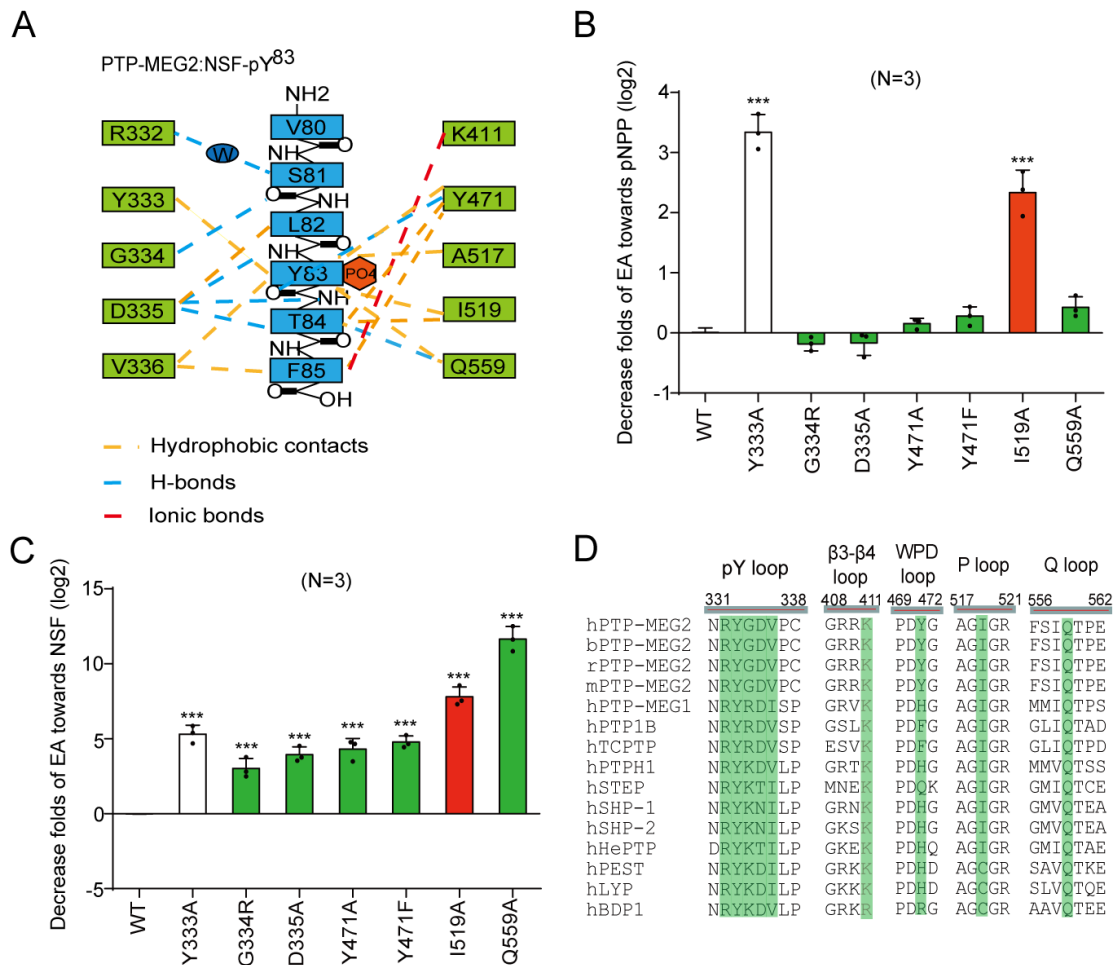

841

842

843 **Figure 3. Molecular determinants of PTP-MEG2 interaction with the NSF-pY<sup>83</sup> site.**

844 (A). Schematic representation of interactions between PTP-MEG2 and the NSF-pY<sup>83</sup> site.

845 (B). Relative values of the decreased phosphatase activities of different PTP-MEG2 mutants  
846 towards pNPP compared with wild-type PTP-MEG2.

847 (C). Fold-change decreases in the phosphatase activities of different PTP-MEG2 mutants  
848 towards the NSF-pY<sup>83</sup> phospho-segment compared with wild-type PTP-MEG2.

849 (D). Sequence alignment of PTP-MEG2 from different species and with other PTP members.

850 Important structural motifs participating in phosphatase catalysis or the recognition of the NSF-  
851 pY<sup>83</sup> site are shown, and key residues contributing to the substrate specificity are highlighted.

852 B-C, the statistical significance was calculated with Student's t test. \*\*\* P<0.001; PTP-MEG2  
853 mutants compared with the control.



## Figure 4

A

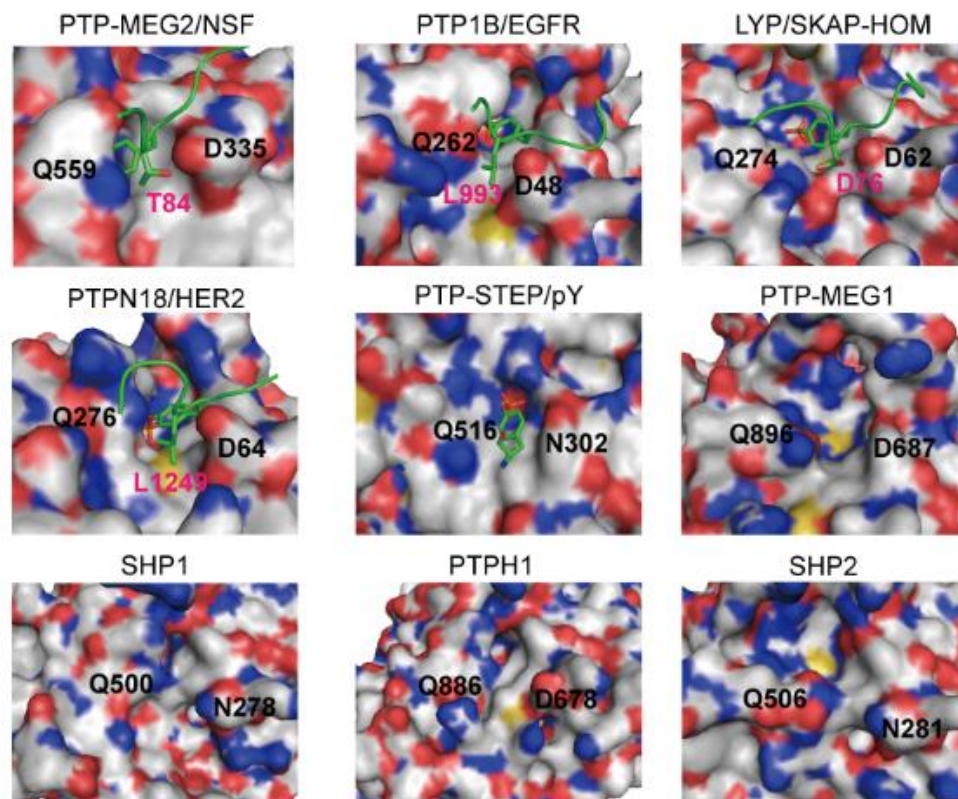

B

| Complex             | PDB code | pY+1 | Distance(Cβ) |           |
|---------------------|----------|------|--------------|-----------|
| PTP-MEG2/NSF(pY83)  |          | T    | 10.42        | D335:Q559 |
| PTP1B/EGFR(pY992)   | 1EEN     | L    | 11.46        | D48:Q262  |
| LYP/SKAP-HOM(pY75)  | 3OMH     | D    | 11.32        | D63:Q274  |
| PTPN18/HER2(pY1248) | 4GFU     | L    | 11.89        | D64:Q276  |
| PTP-STEP/pY         | 2CJZ     |      | 12.43        | N312:Q516 |
| PTP-MEG1            | 2I75     |      | 11.16        | D687:Q896 |
| SHP1                | 4HJQ     |      | 12.27        | N278:Q500 |
| PTPH1               | 4QUN     |      | 12.35        | D678:Q886 |
| SHP2                | 3B7O     |      | 12.44        | N281:Q506 |

854

855

856 **Figure 4. The tip opening of the pY+1 pocket is critical for PTP-MEG2 substrate**  
 857 **specificity.**

858 (A). Surface representations of the complex structures of PTP-MEG2-C<sup>515</sup>A/D<sup>470</sup>A/NSF-pY<sup>83</sup>,  
 859 PTP1B-C<sup>215</sup>A/IRK-pY<sup>1162/1163</sup> (PDB:1EEN), LYP-C<sup>227</sup>S/SKAP-HOM-pY<sup>75</sup> (PDB:3OMH),  
 860 PTPN18-C<sup>229</sup>S/HER2-pY<sup>1248</sup> (PDB:4GFU), and PTP-STEP/pY (PDB:2CJZ). Crystal  
 861 structures of PTP-MEG1 (PDB:2I75), SHP1 (PDB:4HJQ), PTPH1 (PDB:4QUN) and SHP2



862 (PDB: 3B7O). The pY+1 sites are highlighted.  
 863 (B). Summary of the distance between the C $\beta$  atoms of D<sup>335</sup> and Q<sup>559</sup> (corresponding to PTP-  
 864 MEG2 number) of the pY+1 pocket in PTP-MEG2 and other classical non-receptor PTPs  
 865 bearing the same residues at similar positions.

## Figure 5

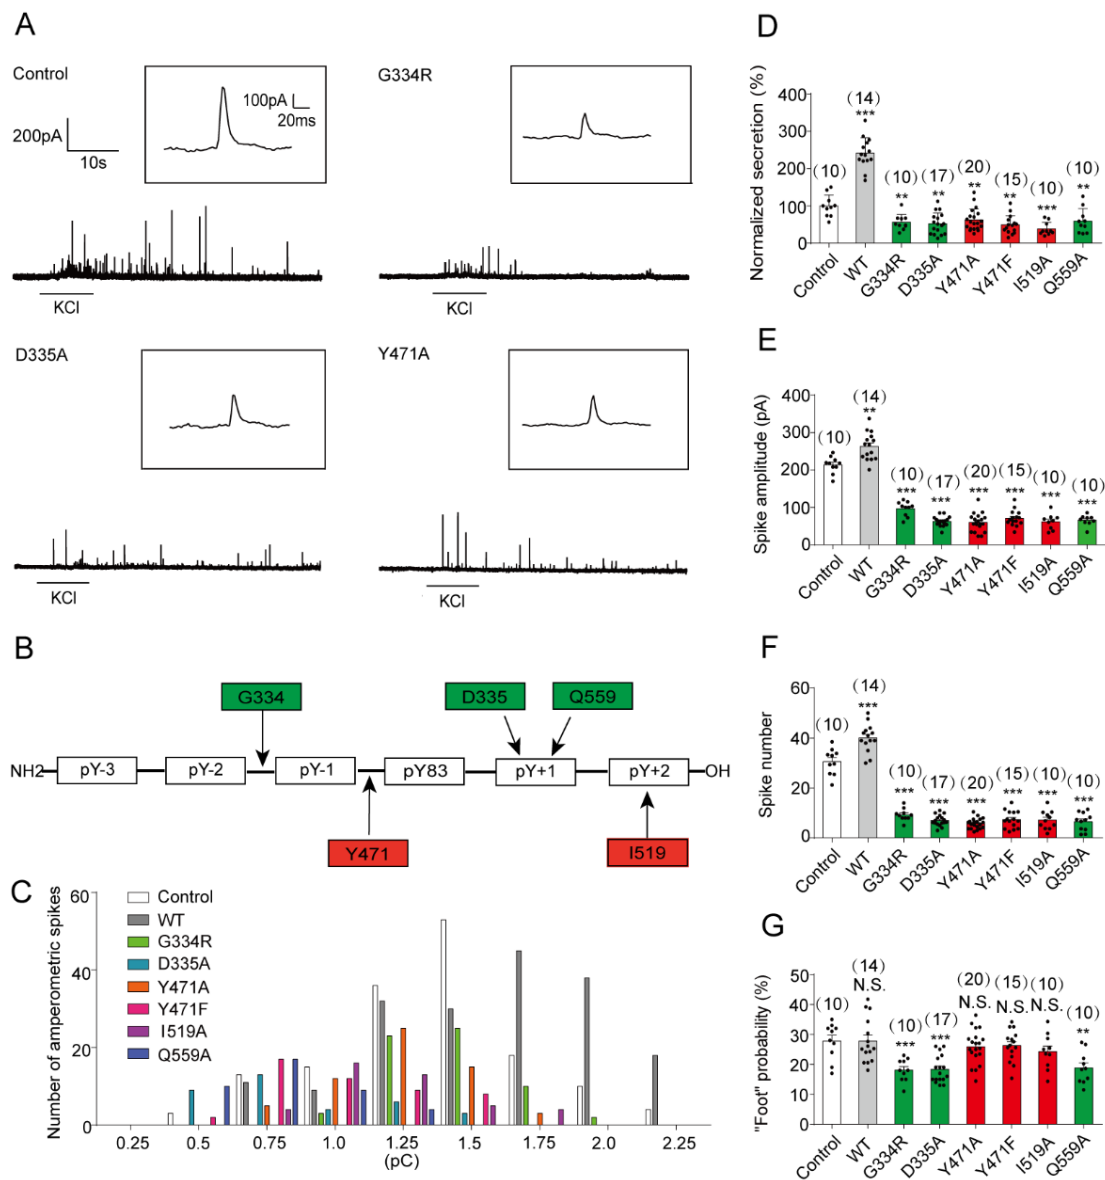

866  
 867  
 868 **Figure 5. Effects of different PTP-MEG2 mutants on properties of catecholamine**  
 869 **secretion from primary chromaffin cells.**

870 (A). Primary mouse chromaffin cells were transduced with a lentivirus containing the gene for  
 871 wild-type PTP-MEG2 or different mutants with a GFP tag at the C-terminus. Positive  
 872 transfected cells were confirmed with green fluorescence and selected for electrochemical  
 873 analysis. Typical amperometric current traces evoked by KCl (70 mM for 5 seconds) in the

874 control (transduced with control vector) (top left panel), G<sup>334</sup>R (top right panel), D<sup>335</sup>A (bottom  
875 left panel), and Y<sup>471</sup>A (bottom right panel) are shown.

876 (B). The schematic diagram shows key residues of PTP-MEG2 defining the substrate  
877 specificity adjacent to the pY<sup>83</sup> site of NSF.

878 (C). The distribution of the quantal size of chromaffin cells transduced with lentivirus  
879 containing the genes encoding different PTP-MEG2 mutants. Data are from 625 amperometric  
880 spikes of 105 chromaffin cells.

881 (D). Statistical diagram of the quantal size in Fig. 5A. The secretion amount of each group was  
882 standardized with respect to the control group.

883 (E-G). Calculated parameters of secretory dynamics, including the spike amplitude (E), spike  
884 number (F), and foot frequency (G).

885 D-G, the statistical significance was calculated with Student's t test. \*, P<0.05; \*\*, P<0.01; \*\*\*  
886 P<0.001: PTP-MEG2 mutants compared with the control.

## Figure 6

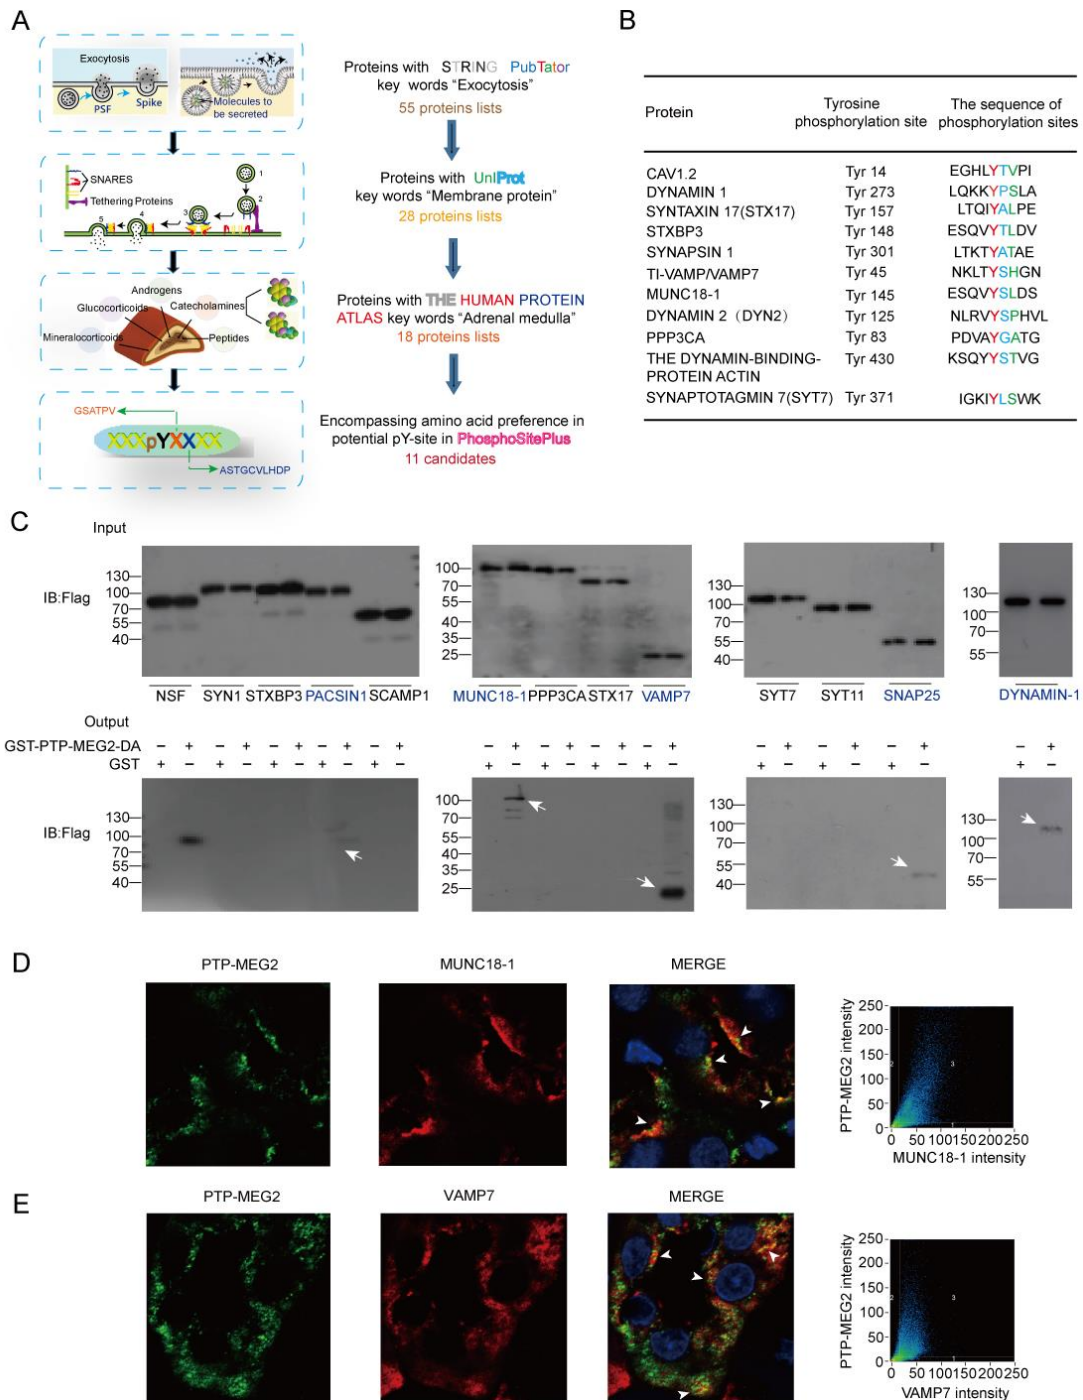

887

888

889 **Figure 6. Identification of potential candidate substrates of PTP-MEG2 that participate**  
 890 **in fusion pore initiation and expansion.**

891 (A). Flowchart for the workflow to predict the candidate substrates of PTP-MEG2 during fusion  
 892 pore initiation and expansion. A total of 55 proteins were enriched with the functional protein  
 893 association network STRING and the text mining tool PubTator by searching the keywords

894 “fusion pore”, “secretory vesicle” and “tyrosine phosphorylation”. These proteins were filtered  
895 with UniProt by selecting proteins located only in the membrane or vesicle, which resulted in  
896 28 candidates. The Human Protein Atlas database was then applied to exclude proteins with no  
897 expression in the adrenal gland. Finally, we used the post-translational-motif database  
898 PhosphoSitePlus to screen candidate proteins with potential phospho-sites that matched our  
899 sequence motif prediction at the pY+1 or pY+2 positions.

900 (B). After the bioinformatics analysis, a total of 11 candidate PTP-MEG2 substrates that may  
901 participate in fusion pore initiation and expansion and their potential phospho-sites were  
902 displayed.

903 (C). The GST pull-down assay suggested that PACSIN1, MUNC18-1, VAMP7, SNAP25 and  
904 DYNAMIN-1 directly interact with PTP-MEG2. PC12 cells were transfected with plasmids of  
905 candidate substrates, including SYN1, STXBP 3, PACSIN 1, SCAMP 1, MUNC18-1, PPP3CA,  
906 STX17, VAMP7, SYT7, SYT11, SNAP 25 and DYNAMIN-1, and stimulated with 100 nM  
907 AngII. The tyrosine phosphorylation of these proteins was verified by specific anti-pY  
908 antibodies (Supplemental Fig. 7-1 A-I). The potential substrates of PTP-MEG2 in cell lysates  
909 were pulled down with a GST-PTP-MEG2-D<sup>470</sup>A trapping mutant and then detected by Western  
910 blotting.

911 (D-E). Co-immunostaining assays of PTP-MEG2 with potential substrates in the adrenal  
912 medulla. MUNC18-1 and VAMP7 all showed strong co-localization with PTP-MEG2 after 100  
913 nM AngII stimulation in the adrenal medulla. The Pearson’s correlation coefficients for D and  
914 E were 0.61 and 0.65, respectively. The co-immunostaining results of PTP-MEG2 with other  
915 potential substrates are shown in Supplemental Fig. 6.

## Figure 7

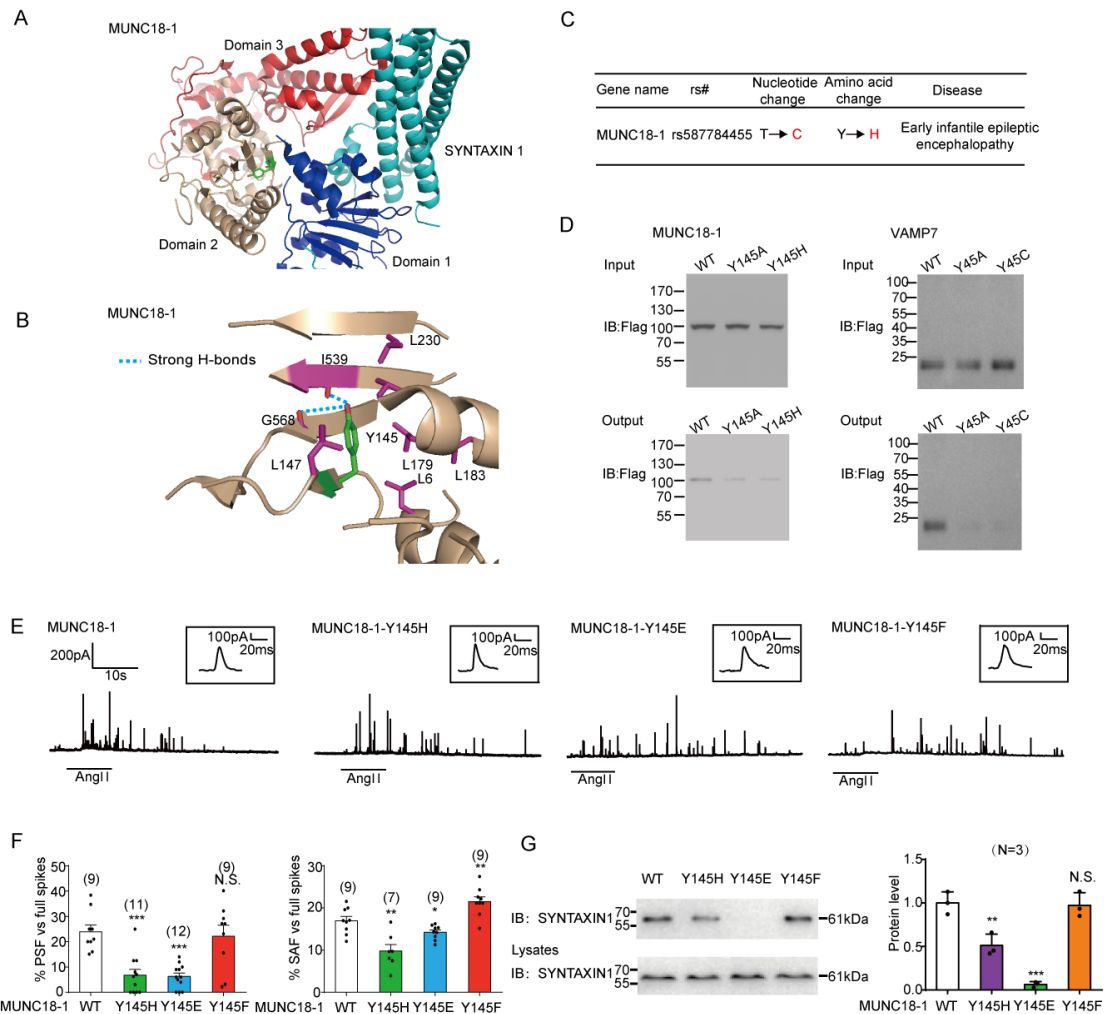

916

917

918 **Figure 7. Dephosphorylation of MUNC18-1 at the pY<sup>145</sup> site by PTP-MEG2 determines**  
 919 **the “foot” probability of catecholamine secretion from chromaffin cells.**

920 (A). Structural representation and location of MUNC18-1-Y<sup>145</sup> in the complex structure of  
 921 MUNC18-1-SYNTAXIN1 (PDB: 3PUJ).

922 (B). Detailed structural representation of Y<sup>145</sup> and its interacting residues. Y<sup>145</sup> of MUNC18-1  
 923 interacts with the main chain carboxylic oxygen of residues I<sup>539</sup> and G<sup>568</sup> and forms hydrophobic  
 924 interactions with L<sup>6</sup>, I<sup>539</sup>, L<sup>147</sup>, L<sup>179</sup>, L<sup>183</sup>, and L<sup>230</sup> to tether the arc shape of the three domains  
 925 of MUNC18-1 (PDB: 3PUJ).

926 (C). Association analysis of SNPs of MUNC18-1 with human disease.

927 (D). Interactions of the PTP-MEG2-trapping mutants with the MUNC18-1-Y<sup>145</sup> mutants (left)

928 and VAMP7-Y<sup>45</sup> mutants (right). PC12 cells were transfected with FLAG-MUNC18-1-Y<sup>145</sup> and

929 different mutations of the FLAG-MUNC18-1-Y<sup>145</sup>A or Y<sup>145</sup>H mutants, the FLAG-VAMP7-Y<sup>45</sup>

930 and different mutations of the FLAG-VAMP7-Y<sup>45</sup>A or Y<sup>45</sup>C mutants 24 hours before

931 stimulation with 100 nM AngII, respectively. The cell lysates were then incubated with GST-  
932 PTP-MEG2-D<sup>470</sup>A for 4 hours with constant rotation. The potential PTP-MEG2 substrates were  
933 pulled down by GST-beads, and their levels were examined by the FLAG antibody with  
934 Western blotting.

935 (E). Primary chromaffin cells were transduced with lentivirus containing the gene encoding  
936 wild-type MUNC18-1 or different mutants. These cells were stimulated with 100 nM AngII.  
937 The amperometric spikes were detected with CFE. Typical amperometric traces are shown.

938 (F). The percentages of pre-spike foot (left) and stand-alone foot (right) for wild-type  
939 MUNC18-1 or different mutants were calculated.

940 (G). The MUNC18-1-Y<sup>145</sup> mutation decreased the interaction between MUNC18-1 and  
941 SYNTAXIN1. PC12 cells were transfected with plasmid carrying SYNTAXIN-1. The  
942 proteins in cell lysates were pulled down with purified GST-MUNC18-1-Y<sup>145</sup> and the GST-  
943 MUNC18-1-Y<sup>145</sup>H/E/F, and detected with SYNTAXIN1 antibody. The right histogram shows  
944 the quantified protein levels. \*\* and \*\*\* represent  $P < 0.01$  and  $P < 0.001$  compared with the  
945 control groups.

946

947

948

949



## Figure 8

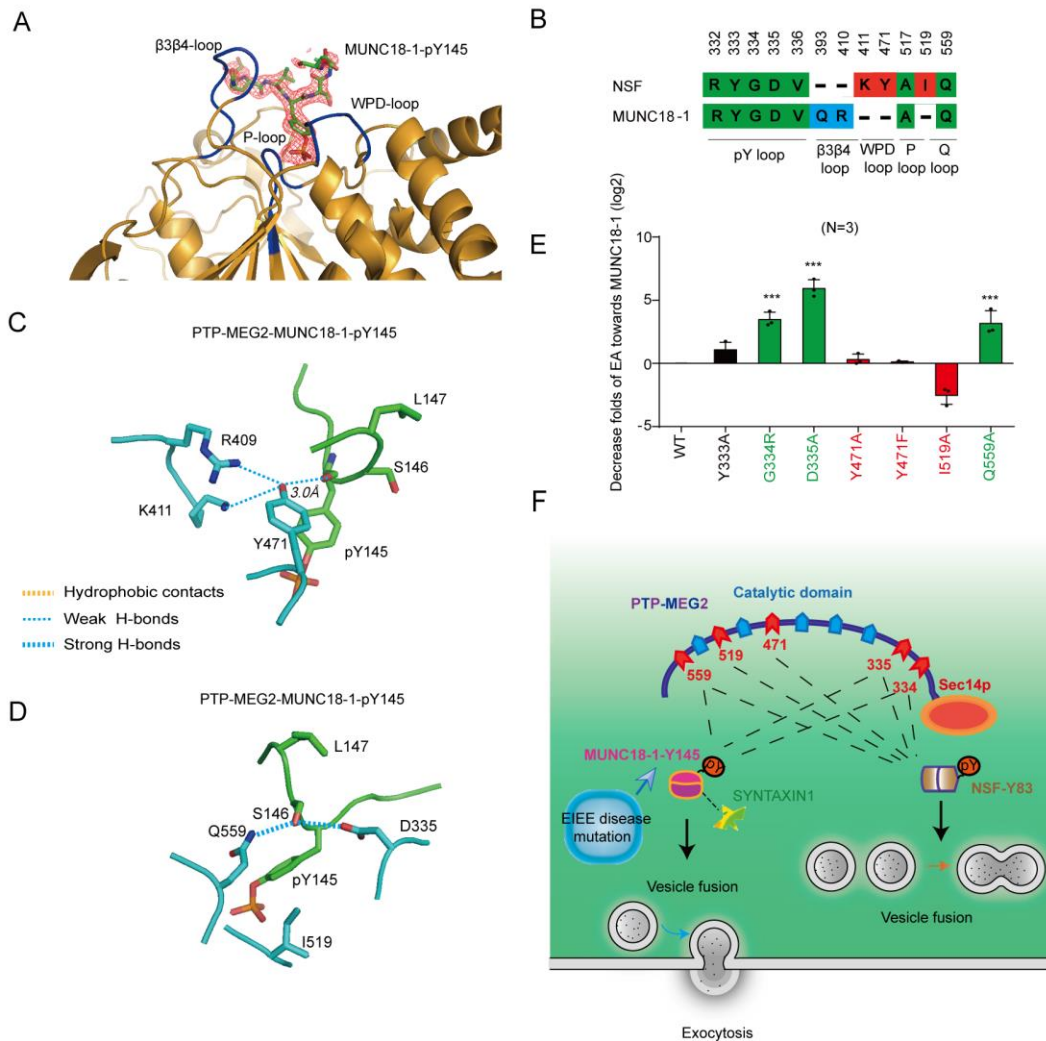

950

951

952 **Figure 8. The structural details of the PTP-MEG2-MUNC18-1-Y<sup>145</sup> interaction and**  
 953 **catalytic bias of PTP-MEG2 towards NSF-pY<sup>83</sup> and MUNC18-1-pY<sup>145</sup>**

954 (A). The 2Fo-Fc annealing omit map (contoured at 1.0 $\sigma$ ) around MUNC18-1-pY<sup>145</sup> phospho-  
 955 segment.

956 (B). Comparison of residues of PTP-MEG2 interacting with NSF and MUNC18-1. Amino acid  
 957 residues of NSF and MUNC18-1 are coloured as follows: green, residues interacting with both  
 958 NSF and MUNC18-1; red, residues strongly contributing to NSF recognition; blue, residues  
 959 strongly contributing to MUNC18-1 interaction.

960 (C). The structural alteration of the interactions surrounding Y<sup>471</sup> of PTP-MEG2 with the  
 961 MUNC18-1-pY<sup>145</sup> site.

962 (D). The structural alteration of the interactions surrounding I<sup>519</sup> of PTP-MEG2 with the  
 963 MUNC18-1-pY<sup>145</sup> site.

964 (E). Relative phosphatase activities of different PTP-MEG2 mutants towards the MUNC18-1-

965 pY<sup>145</sup> phospho-segment compared with wild-type PTP-MEG2.  
966 (F). Schematic illustration of the PTP-MEG2-regulated processes of vesicle fusion and  
967 secretion in chromaffin cells via the dephosphorylation of different substrates with distinct  
968 structural basis. PTP-MEG2 regulates vesicle fusion and vesicle size during the catecholamine  
969 secretion of adrenal gland by modulating the phosphorylation state of the pY<sup>83</sup> site of NSF,  
970 which relies on the key residues G<sup>334</sup>, D<sup>335</sup> (pY loop), Y<sup>471</sup> (WPD loop), I<sup>519</sup> (P-loop) and Q<sup>559</sup>  
971 (Q loop). PTP-MEG2 regulates the fusion pore initiation and expansion procedures of  
972 catecholamine secretion by the adrenal gland (also designated as foot probability) by  
973 modulating the newly identified substrate MUNC18-1 at its pY<sup>145</sup> site, a distinct structural basis  
974 from that of its regulation of NSF phosphorylation. Defects in the dynamic tyrosine  
975 phosphorylation of the MUNC18-1 pY<sup>145</sup> site and its interaction with PTP-MEG2 may  
976 contribute to early infantile epilepsy encephalopathy (EIEE).

977

## 978 STAR★METHODS

### 979 KEY RESOURCES TABLE

980

| REAGENT or RESOURCE | SOURCE                    | IDENTIFIER       |
|---------------------|---------------------------|------------------|
| Antibodies          |                           |                  |
| NSF Antibody        | Proteintech               | Cat # 21171-1-AP |
| MUNC18-1 Antibody   | Proteintech               | Cat # 11459-1-AP |
| VAMP7 Antibody      | Proteintech               | Cat # 22268-1-AP |
| SNAP25 Antibody     | Proteintech               | Cat # 14903-1-AP |
| PACSIN1 Antibody    | Proteintech               | Cat # 13219-1-AP |
| SYNTAXIN1a Antibody | Proteintech               | Cat # 66437-1-Ig |
| pTyr(PY20) Antibody | Santa Cruz                | Cat # sc-508     |
| pTyr(PY99) Antibody | Santa Cruz                | Cat # sc-7020    |
| FLAG Antibody       | Cell Signaling Technology | Cat # 2368       |
| GAPDH Antibody      | Cell Signaling Technology | Cat # 5174       |
| PTP-MEG2 Antibody   | R&D Systems               | Cat # MAB2668    |
| DYNAMIN1 Antibody   | Abcam                     | Cat # MAB52611   |

### Chemicals, Peptides, and Recombinant Proteins

|                                                              |                                                         |               |
|--------------------------------------------------------------|---------------------------------------------------------|---------------|
| Anti-GST-tag beads                                           | TransGen Biotech Co., Ltd                               | Cat # DP201   |
| Protein A/G-PLUS-Agarose                                     | Santa Cruz                                              | Cat # sc-2003 |
| Ni-NTA Agarose                                               | Thermo Fisher scientific                                | Cat # R90101  |
| The phospho-peptide of NSF<br>“EVSL <sub>p</sub> YTFDK”      | China Peptides Co., Ltd                                 | N/A           |
| The phospho-peptide of MUNC18-1<br>“ESQV <sub>p</sub> YSLDS” | China Peptides Co., Ltd                                 | N/A           |
| Mouse EPI ELISA Kit                                          | Shanghai Jianglai Co.,Ltd                               | JL11194-48T   |
| Mouse NE ELISA Kit                                           | Shanghai Jianglai Co.,Ltd                               | JL13969-96T   |
| Angiotensin II (HDRVYIHPF-OH)                                | China Peptides Co., Ltd                                 | N/A           |
| Compound 7(PTP-MEG2 inhibitor)                               | Synthesized as previously described(Zhang et al., 2012) |               |

#### Experimental Models: Cell Lines

|      |      |          |
|------|------|----------|
| 293  | ATCC | CRL-1573 |
| 293T | ATCC | CRL-3216 |
| PC12 | ATCC | CRL-1721 |

#### Software and Algorithms

|        |                                                             |                                                                           |
|--------|-------------------------------------------------------------|---------------------------------------------------------------------------|
| PyMol  | Schrödinger                                                 | <a href="https://www.pymol.org/">https://www.pymol.org/</a>               |
| CCP4i  | Instruct Associate Centre for Integrated Structural Biology | <a href="http://www.ccp4.ac.uk/">http://www.ccp4.ac.uk/</a>               |
| Phenix | The PHENIX Industrial Consortium                            | <a href="https://www.phenix-online.org">https://www.phenix-online.org</a> |
| Igor   | Fourier Transform                                           | <a href="https://www.wavemetrics.com/">https://www.wavemetrics.com/</a>   |
| Prism  | GraphPad                                                    | <a href="http://www.graphpad.com">http://www.graphpad.com</a>             |

981

982 **CONTACT FOR REAGENT AND RESOURCE SHARING**

983 Further information and requests for resources and reagents should be directed to and will be  
984 fulfilled by the Lead Contact, Professor Xiao Yu. (yuxiao@sdu.edu.cn) or Jinpeng Sun  
985 (sunjinpeng@bjmu.edu.cn)

986 **EXPERIMENTAL MODEL AND SUBJECT DETAILS**

987

988 **Cell Culture**

989 The HEK293 cell lines, the 293T cell lines and PC12 cell lines were originally obtained from  
990 the American Type Culture Collection (ATCC). The HEK293 cell lines and 293T cell lines  
991 were grown in DMEM with 10% FBS (Gibco, Grand Island, NY, US) and 1%  
992 penicillin/streptomycin at 37 °C. PC12 cells were maintained at 37 °C in DMEM medium  
993 containing 10% FBS (Gibco, US), 5% donor equine serum (Gibco, US) and 1%  
994 penicillin/streptomycin.

995

996 **METHOD DETAILS**

997

998 **Constructs**

999 Sequences of PTP-MEG2 catalytic domain were subcloned into PET-15b expression vector  
1000 with an N-terminal His tag or PGEX-6P-2 expression vector containing an N-terminal GST  
1001 tag. The mutations of PTP-MEG2 were constructed by the Quikchange kit from Stratagene .

1002

| Plasmid                    | Primer sequence                                                                                                    |
|----------------------------|--------------------------------------------------------------------------------------------------------------------|
| His-<br>PTPMEG2-<br>333Y-A | F:5'GAAACCTAGAGAAAAACCGTGCGGGGGATGTACCCTGCCTG<br>GAC 3'<br>R:5'GTCCAGGCAGGGTACATCCCCCGCACGGTTTTTCTCTAGGTT<br>TC 3' |
| His-<br>PTPMEG2-<br>334G-R | F: 5' CTAGAGAAAAACCGTTATCGTGATGTACCCTGCCTGGAC 3'<br>R: 5' GTCCAGGCAGGGTACATCACGATAACGGTTTTTCTCTAG 3'               |
| His-<br>PTPMEG2-           | F: 5' GAAAAACCGTTATGGGGCGGTACCCTGCCTGGACC 3'<br>R: 5' GGTCCAGGCAGGGTACCGCCCCATAACGGTTTTTC 3'                       |

|                     |                                                                                                                                            |
|---------------------|--------------------------------------------------------------------------------------------------------------------------------------------|
| 335D-A              |                                                                                                                                            |
| His-PTPMEG2-471Y-A  | F: 5' AGTTCTTGAGCTGGCCAGACGCGGGTGTCCCTTCCTCA 3'<br>R: 5' TGAGGAAGGGACACCCGCGTCTGGCCAGCTCAAGAACT 3'                                         |
| His-PTPMEG2-471Y-F  | F: 5' GCTGGCCAGACTTTGGTGTCCCTTC 3'<br>R: 5' GAAGGGACACCAAAGTCTGGCCAGC 3'                                                                   |
| His-PTPMEG2-519I-A  | F: 5' ATTGCAGTGCAGGCGCGGGCAGGACAGGT 3'<br>R: 5' ACCTGTCCCTGCCCCGCGCCTGCACTGCAAT 3'                                                         |
| His-PTPMEG2-559Q-A  | F: 5' AGAGGGCCTTCAGCATCGCGACCCCTGAGCAGTACTA 3'<br>R: 5' TAGTACTGCTCAGGGGTGCGGATGCTGAAGGCCCTCT 3'                                           |
| PCDH-PTPMEG2        | F: 5' CCATAGAAGATTCTAGAATGGAGCCCCGCGACC 3'<br>R: 5' CGTCGACTGCAGAATTCTTACAGATCCTCTTC 3'                                                    |
| MUNC18-1-GFP-145Y-H | F:5'TTCTCCCCTATGAGTCCCAGGTGCATTCCTGGACTCCGCTGACTCT 3'<br>R:5'AGAGTCAGCGGAGTCCAGGGAATGCACCTGGGACTCATAGGGAGAA 3'                             |
| MUNC18-1-GFP-145Y-A | F:5'TCTCCCCTATGAGTCCCAGGTGGCTTCCCTGGACTCCGCTGACTCTT 3'<br>R:5'AAGAGTCAGCGGAGTCCAGGGAAGCCACCTGGGACTCATAGGGGAGA 3'                           |
| GST-MUNC18-1-145Y-H | F:5'TCCAAAATCGGATCTGGTTCCGCGTGGATCCATGGATTACAA GGATGACGACGATA 3'<br>R:5'CGAGGCAGATCGTCAGTCAGTCACGATGCGGCCGCTCACTCATTGTTGGAGCCTGATCCTCAA 3' |
| GST-MUNC18-1-145Y-E | F:5'TCTCCCCTATGAGTCCCAGGTGGAGTCCCTGGACTCCGCTGACTCTTTCC 3'<br>R:5'GTCAGCGGAGTCCAGGGACTCCACCTGGGACTCATAGGGGAGAAACGC 3'                       |
| GST-MUNC18-1-145Y-F | F:5'TCTCCCCTATGAGTCCCAGGTGTTTTCCCTGGACTCCGCTGACTTTTC 3'<br>F:5'GAAAGAGTCAGCGGAGTCCAGGAAAACACCTGGGACTCATAGGGG 3'                            |
| FLAG-VAMP7-45Y-A    | F: 5' CTGAAAATAATAAACTAACTGCCTCACATGGCAATTATTTGT 3'<br>R: 5' ACAATAATTGCCATGTGAGGCAGTTAGTTTATTATTTTCAG 3'                                  |
| FLAG-VAMP7-45Y-C    | F: 5' CTGAAAATAATAAACTAACTGCTCACATGGCAATTATTTG 3'<br>R: 5' CAAATAATTGCCATGTGAGCAAGTTAGTTTATTATTTTCAG 3'                                    |
| DYNAMIN1-RFP-354Y-A | F: 5' GAGACCAGATCGACACTGCTGAACTGTCAGGTGGAGCCCG 3'<br>R:5'CTCCACCTGACAGTTCAGCAGTGTCGATCTGGTCTCCAGAACC 3'                                    |
| DYNAMIN1-RFP-597Y-A | F:5'CACTGAGCAGAGGAATGTCGCTAAGGATTACCGGCAGCTGGA AACTG 3'                                                                                    |



|                   |                                                                                                                                                    |
|-------------------|----------------------------------------------------------------------------------------------------------------------------------------------------|
|                   | R:5'CAGCTGCCGGTAATCCTTAGCGACATTCCTCTGCTCAGTGTT<br>GAA 3'                                                                                           |
| SNAP25-101Y-<br>A | F:5'TCGCCACCATGGATTACAAGGATGACGACGATAAGATGGCCG<br>AGGACGCAGACATGCGTA 3'<br>R:5'TACGCATGTCTGCGTCCTCGGCCATCTTATCGTCGTCATCCTT<br>GTAATCCATGGTGGCGA 3' |

1003

1004

1005 **Recombinant lentivirus construction and lentivirus infection.**

1006 For recombinant lentivirus packaging, the construction and infection was carried out as  
1007 previously reported (Zhang et al., 2018). Plasmids carrying different genes including pCDH-  
1008 PTP-MEG2-GFP, pCDH-PTP-MEG2-G<sup>334</sup>R/D<sup>335</sup>A/Y<sup>471</sup>A/Y<sup>471</sup>F/I<sup>519</sup>A/Q<sup>559</sup>A-GFP and pCDH-  
1009 MUNC18-1-Y<sup>145</sup>H/Y<sup>145</sup>E/Y<sup>145</sup>F/WT-GFP were transfected into 293T cells using Lipofectamine  
1010 TM 2000 (Thermo Fisher, Waltham, MA, USA) according to the manufacturer's instructions.  
1011 Three days after transfection, the supernatant of virus encoding PTP-MEG2 or MUNC18-1  
1012 were collected and filtered. The PTP-MEG2 or MUNC18-1 lentivirus ( $1 \times 10^6$  TU/ml) was used  
1013 to infect the primary chromaffin cells in later experiments.

1014

1015 **ELISA.**

1016 Freshly isolated adrenal medullas from adult female mice (6–8 weeks) were cultured in DMEM  
1017 medium containing 1% penicillin/streptomycin and 10% FBS. After 2 hours starvation, adrenal  
1018 medullas were stimulated with high KCl (70mM), Angiotensin II (100nM) for 1 min, with or  
1019 without pre-incubation of a specific PTP-MEG2 inhibitor (2 $\mu$ M) for 2 hours. The supernatants  
1020 were collected and the epinephrine or norepinephrine secretion were determined by using the  
1021 Epinephrine or norepinephrine ELISA kit (Shanghai Jianglai Co.,Ltd, JL11194-48T/JL13969-  
1022 96T) according to the manufacture's protocol.

1023

1024 **Electrochemical amperometry**

1025 5-mm glass carbon fiber electrode (CFE) was used to measure quantal CA released from the  
1026 mouse adrenal medulla chromaffin cell as previously described (Liu et al., 2017). We used a  
1027 Multiclamp 700B amplifier (2012, Axon, Molecular Devices, USA) to perform electrochemical  
1028 amperometry, which interfaced to Digidata 1440A with the pClamp 10.2 software (Liu et al.,

1029 2017). The holding potential of 780 mV was used to record the amperometric current ( $I_{amp}$ ).  
1030 All experiments were performed at room temperature (20–25°C). The CFE surface was  
1031 positioned in contact with the membrane of clean primary chromaffin cells to monitor the  
1032 quantal release of the hormone containing catecholamine substances. In our kinetic analysis of  
1033 single amperometric spike, we only used the amperometric spikes with  $S/N > 3$  (signal/noise).  
1034 The standard external solution for our amperometry measurement is as follows: 5 mM KCl, 10  
1035 mM glucose, 10 mM HEPES pH 7.4, 2 mM  $CaCl_2$ , 150 mM NaCl and 2 mM  $MgCl_2$ . We  
1036 analysed all data using Igor (WaveMetrix, Lake Oswego, Oregon) and a custom-made macro  
1037 programme. Statistical data were given as the mean  $\pm$  SEM and analyzed with t-test or two-  
1038 way ANOVA.

1039

#### 1040 **Electron microscopy**

1041 The female mice (6–8 weeks) were decapitated, and the adrenal medullas were freshly isolated  
1042 and cut to 150- $\mu$ m-thick sections. The sections were immersed in Ringer's saline (125mM NaCl,  
1043 2.5mM KCl, 1.25mM  $NaH_2PO_4$ , 26mM  $NaHCO_3$ , 10mM D-Glucose, 2mM  $CaCl_2$ , 1mM  $MgCl_2$ )  
1044 for 40 minutes at room temperature. During this period, continuous gases of 5%  $CO_2$  and 95%  
1045  $O_2$  were offered to the saline to ensure the survival of the tissue slice. After 40 minutes of  
1046 starvation, the sections were stimulated with different conditions (control; only 100nM AngII  
1047 agonists for 1 min; only 400nM PTP-MEG2 inhibitor for 45 min; 100nM AngII agonists and  
1048 400nM PTP-MEG2 inhibitor for 1 min or 45 min) at 37°C respectively. These sections were  
1049 firstly immersed in precooled 3% glutaraldehyde and fixed at 4°C for 2 hours, and then rinsed  
1050 in PBS isotonic buffer, with repeated liquid exchanges and cleaning overnight, so that the  
1051 samples were thoroughly rinsed and soaked in the buffer. After rinsing, the sample was fixed at  
1052 4°C with 1% osmium acid for 2 hours. It was rinsed with isosmotic buffer solution at 0.1M PBS  
1053 for 15 minutes. The sections were dehydrated with ethanol at concentrations of 50%, 70%, 90%,  
1054 then ethanol at concentration of 90% and acetone at concentration of 90%, at last only acetone  
1055 at concentrations of 90%, 100%. We then replaced the acetone with the Epon gradually. The  
1056 sections were added to Epon and polymerized at 60°C for 36 hours. Ultra-thin sections were  
1057 performed at the thickness of 60nm by the LKB-1 ultra microtome, and then the ultra-thin  
1058 sections were collected with the single-hole copper ring attached with formvar film. The sample

1059 was stained with 2% uranium acetate for 30 minutes, and then stained with 0.5% lead citrate  
1060 for 15 minutes. These prepared samples were examined by JEM-1200EX electron microscope  
1061 (Japan).

1062

### 1063 **Western**

1064 Cells or medulla sections were lysed in lysis buffer (50 mM Tris pH 8.0, 150 mM NaCl, 1 mM  
1065 NaF, 1% NP-40, 2mM EDTA, Tris-HCl pH 8.0, 10% glycerol, 0.25% sodium deoxycholate,  
1066 1mM Na<sub>3</sub>VO<sub>4</sub>, 0.3μM aprotinin, 130μM bestatin, 1μM leupeptin, 1μM repstatin and 0.5% IAA)  
1067 after rinsing with the pre-chilled PBS on ice. Cell and tissue lysates were kept on ice for 35  
1068 min and then sediment via centrifugation for 15 min at 4 °C. The whole-cell and tissue protein  
1069 lysates samples (30μg) were prepared for SDS-PAGE. The proteins in the gel were transferred  
1070 to a nitrocellulose filter membrane by electro blotting, then probed with the appropriate primary  
1071 and secondary antibodies. Antibody binding was detected by an HRP system.

1072

### 1073 **Immunofluorescence.**

1074 For the acquisition of tissue cells used in immunofluorescence, the mice were decapitated, and  
1075 the the adrenal medullas were freshly isolated (female mice, 6–8 weeks).The isolated adrenal  
1076 medullas was immersed in 4% paraformaldehyde for fixation overnight at 4°C. Then the fixed  
1077 tissues were washed for 4 hours in PBS containing 10% sucrose at 4°C for 8 hours in 20%  
1078 sucrose, and in 30% sucrose overnight. Then these adrenal medullas were imbedded in Tissue-  
1079 Tek OCT compound and then mounted and frozen them at -25°C. Subsequently, the adrenal  
1080 medulla were cut to 4-μm-thick coronal serial sections. The adrenal medullas sections were  
1081 blocked with 1% (vol/vol) donkey serum, 2.5% (wt/vol) BSA and 0.1% (vol/vol) Triton X-100  
1082 in PBS for 1.5 h. Then, the slides were incubated with primary antibodies against PTP-MEG2  
1083 (1:100), NSF (1:50), MUNC18-1 (1:50), VAMP7 (1:50), DYNAMIN1 (1:50), SNAP25 (1:100),  
1084 PACSIN1 (1:50) at 4°C overnight. After washing with PBS for 3 times, the slides were  
1085 incubated with the secondary antibody (1:500) for 1 h at room temperature. The slides were  
1086 stained with DAPI (1:2000). Images were captured using a confocal microscope (ZEISS,  
1087 LSM780). The Pearson's co-localization coefficients were analyzed with Image-Pro Plus.

1088

1089  **$K_m$  and  $k_{cat}$  measurements.**

1090 Enzymatic activity measurement was carried out as previously reported (Wang et al., 2014, Li  
1091 et al., 2016). The standard solution (DMG buffer) for our enzymatic reactions is following: 50  
1092 mM 3,3-dimethyl glutarate pH 7.0, 1 mM EDTA, 1 mM DTT. The ionic strength was  
1093 maintained at 0.15 M (adjusted by NaCl). For the pNPP activity measurement, 100  $\mu$ l reaction  
1094 mixtures were set up in a total volume in a 96-well polystyrene plate (Thermo Fisher Scientific,  
1095 Waltham, MA, US). The substrate concentration ranging from 0.2 to 5  $K_m$  was used to  
1096 determine the  $k_{cat}$  and  $K_m$  values. Reactions were started by the addition of an appropriate  
1097 amount of His-PTP-MEG2-CD-WT or corresponding mutants, such as Y<sup>333</sup>A, G<sup>334</sup>R, D<sup>335</sup>A,  
1098 Y<sup>471</sup>A, Y<sup>471</sup>F, I<sup>519</sup>A and Q<sup>559</sup>A. The dephosphorylation of pNPP was terminated by adding 120 $\mu$ l  
1099 1M NaOH, and the enzymatic activity was monitored by measuring the absorbance at 405 nm.  
1100 The activities toward phospho-peptide segment derived from NSF or MUNC18-1 were  
1101 measured as following: In the first column, 90 $\mu$ l diluted NSF/MUNC18-1 phospho-peptide  
1102 substrate (100 $\mu$ M) was added. The successive columns were diluted by 1.5 times. The phospho-  
1103 peptide substrates were preincubated at 37°C for 5 min. Reactions were started by the addition  
1104 of an appropriate amount of enzymes. The dephosphorylation of NSF/MUNC18-1 was  
1105 terminated by adding 120 $\mu$ l Biomol green, and the enzymatic activities were monitored by  
1106 measuring the absorbance at 620 nm. The steady-state kinetic parameters were determined from  
1107 a direct fit of the data to the Michaelis-Menten equation using GraphPad Prism 5.0.

1108

1109 **GST-pull down.**

1110 To screen the candidate proteins interacting with PTP-MEG2, the GST beads were washed five  
1111 times by cold binding buffer (20mM HEPES pH7.5, 1mM DTT, 1mM EDTA, and 100mM  
1112 NaCl) and incubated with 5 $\mu$ g purified GST-PTP-MEG2-CD-D<sup>470</sup>A protein for 2 hours at 4°C.  
1113 PC12 cells were transfected with FLAG-SYN1-GFP, FLAG-MUNC18-1-GFP, FLAG-  
1114 STXBP3-GFP, FLAG-PACSIN1-GFP, FLAG-SCAMP1-GFP, FLAG-PPP3CA-GFP, FLAG-  
1115 STX17-GFP, FLAG-VAMP7, FLAG-SYT7-GFP, FLAG-SYT11-GFP, FLAG-SNAP25-GFP,  
1116 FLAG-DYNAMIN-1-GFP. After stimulation with 100 $\mu$ M Na<sub>3</sub>VO<sub>4</sub> and 100 $\mu$ M H<sub>2</sub>O<sub>2</sub> for 10  
1117 minutes at 37 °C, the cells were washed and then lysed in lysis buffer [20 mM HEPES pH 7.5,  
1118 100 mM NaCl, 0.5% NP-40, 5 mM iodoacetic acid, and a protease inhibitor mixture (final

1119 concentrations, 10µg of leupeptin, 1µg of aprotinin, 1µg of pepstatin, 1µg of antipain, and 20µg  
1120 of phenylmethylsulfonyl fluoride per ml), 10mM DTT, 2mM EDTA] on ice for 30 minutes,  
1121 then centrifuged at 12000rpm for 15 minutes at 4 °C. 20µl GST beads- PTP-MEG2-D<sup>470</sup>A  
1122 protein was added into 500µl supernatants and the mixtures were subjected to end-to-end  
1123 rotation at 4 °C for 2 hours. The GST beads and their binding proteins were washed five times  
1124 with cold binding buffer to exclude the unspecific binding proteins.

1125 The pull down experiment of MUNC18-1 and SYNTAXIN1 were described similar to  
1126 above description. The GST beads were washed five times by cold binding buffer (described  
1127 as above). After that, 5µg purified GST-MUNC18-1-WT or its Y<sup>145</sup>H, Y<sup>145</sup>E or Y<sup>145</sup>F mutant  
1128 proteins were added into 20µl GST-agarose, and incubated at for 4 °C 2 hours with end to end  
1129 rotation. PC12 cells transfected with FLAG-SYNTAXIN1 were lysed in lysis buffer (described  
1130 as above) and centrifuged to remove the pellets. The supernatants were added with 20µl GST  
1131 beads/GST-fusion protein and the mixtures were subjected to end-to-end rotation at 4 °C for 2  
1132 hours. The FLAG-SYNTAXIN1 was detected with FLAG antibody.

1133

#### 1134 **Immunoprecipitation and in vitro dephosphorylation**

1135 Rat adrenal medullas were isolated and cut into pieces in D-hanks buffer, and stimulated with  
1136 70mM KCl or 100nM AII for 2 minutes. The tissues were then lysed and grinded on ice in lysis  
1137 buffer supplemented with proteinase inhibitor as described before. The lysates were centrifuged  
1138 at 12000 rpm for 20 minutes at 4 °C and the pellets were removed. Before incubation with the  
1139 lysates in the later step, the 10µg primary antibodies of NSF, MUNC18-1, VAMP7 or SNAP25  
1140 were incubated with 60µl Protein A/G beads by end-to-end rotation overnight at 4 °C. Then the  
1141 supernatants were incubated with primary antibody pre-coated with Protein A/G beads and  
1142 rotated for 2 hours. 60µg purified PTP-MEG2-WT protein or control solution were added into  
1143 the lysates for the in vitro dephosphorylation. A pan-phospho-tyrosine antibody pY<sup>20</sup> was used  
1144 in Western blotting to detect the phosphorylated tyrosine of NSF/MUNC18-1/VAMP7/SNAP25  
1145 in adrenal medullar with or without incubation with the PTP-MEG2.

1146

#### 1147 **Protein Expression and Purification**

1148 The wide type and mutant proteins of His-tagged PTP-MEG2-catalytic domain were expressed



1149 in BL21-DE3 Escherichia coli as previously described (Pan et al., 2013). In brief, 0.4 mM  
1150 isopropyl1-thio-D-galactopyranoside (IPTG) was used to induce the expression of His-PTP-  
1151 MEG2, and the bacteria lysates were centrifuged at 12000 rpm for 1 hour. Ni-NTA Agrose was  
1152 applied to bind the His-tagged PTP-MEG2 and an imidazole gradation was used to elute the  
1153 binding proteins. His-PTP-MEG2 was then purified with gel filtration chromatography to  
1154 achieve at least 95% purity. The wide type and mutant proteins of GST-PTP-MEG2 and GST-  
1155 MUNC18-1 were also expression in E.coli in presence of 0.4 mM IPTG for 16 hours at 25°C.  
1156 After centrifugation and lysis, the proteins were purified by binding with GST-Sepharose for 2  
1157 hours and eluted by GSH.

1158

1159

### 1160 **Crystallization and Data Collection**

1161 For crystallization, His-PTP-MEG2-C<sup>515</sup>S/D<sup>470</sup>A protein (concentration at 15mg/ml) was  
1162 mixed with NSF-pY<sup>83</sup> peptide (EVSLpYTFDK) or MUNC18-1-pY<sup>145</sup> peptide (ESQVpYSLDS)  
1163 with molar ratio as 1:3 in buffer A (pH 7.2, 20 mM Hepes, 350 mM NaCl, and 1 mM DTT).  
1164 1µl mixed protein was blended with 1µl buffer B (pH 6.4, 20% PEG 4000, 0.2M KSCN, 10%  
1165 ethelene glycol, 0.1M bis-tris propane) at 4°C for 3 days before crystals appears. The cubic  
1166 crystals were preserved in liquid nitrogen very quickly dipped in storage buffer (buffer B  
1167 supplemented with 10% glycerol). The data were collected at Shanghai Synchrotron Radiation  
1168 Facility beamline BL17U1 using 0.98Å X-ray wave length and analyzed by HKL2000.

1169

### 1170 **Structural determination and refinement**

1171 The crystals of PTP-MEG2-NSF-pY<sup>83</sup> and PTP-MEG2-MUNC18-1-pY<sup>145</sup> peptides belong to  
1172 the P2<sub>1</sub>2<sub>1</sub>2 space group. In each asymmetric unit, both PTPMEG2-NSF-pY<sup>83</sup> and PTPMEG2-  
1173 MUNC18-1-pY<sup>145</sup> contain one monomer in one unit. Molecular replacement with Phaser in the  
1174 CCP4 software package, with PTP-MEG2 catalytic domain (PDB code: 2PA5, water deleted)  
1175 as the initial search model. Further refinements were carried out using the PHENIX program  
1176 with iterative manual building in COOT. The data of the final refined structures are shown in  
1177 Supplementary information Table S1.

1178

1179

1180 **Bioinformatic search of PTP-protein interactions**

1181 We identified the PTP-protein interactions by two independent bioinformatic analyses. On one  
1182 site, we extracted the potential PTP-interacting proteins from the STRING database  
1183 (Szklarczyk et al., 2015) by setting the parameters of Homo sapiens. On the other site, we used  
1184 Pubtator (Wei et al., 2013) to text-mine potential PTP-protein associations from PubMed  
1185 literature (by 2018.9) via the search of combinational keywords such as “tyrosine  
1186 phosphorylation mutation, vesicular, fusion, and human”. We compared these two protein lists  
1187 to produce a consensus PTP-interacting protein list. Subsequently, we narrowed down the  
1188 protein list by satisfying following constraints: (a) The protein should express in the adrenal  
1189 gland as documented in the TissueAtlas (Thul et al., 2017); (b) The protein should expose  
1190 tyrosine residue(s) on surface for phosphorylation as simulated by the Molecular Operating  
1191 Environment (MOE) (Vilar et al., 2008); (c) On the protein, at least one predicted tyrosine  
1192 phosphorylation site predicted by the PhosphoSitePlus (Hornbeck et al., 2015) is also  
1193 experiment-validated. The refined PTP-protein pairs were then ready for later experimental  
1194 analyses.

1195

1196

1197 **Statistical analysis**

1198 All data are presented as mean  $\pm$  SEM. The statistical significance between different groups  
1199 was compared with ANOVA tests, and the statistical significance between two different groups  
1200 was generated by student's t test. All of the Western films were scanned, and band intensity was  
1201 quantified with ImageJ software (National Institutes of Health, Bethesda MD).  $P < 0.05$  was  
1202 considered as statistically significant.

1203 Table -1 Crystallographic Data and Refinement Statistics

1204
